# Supplementary material for: Metabolic profiles of Lactobacillus paraplantarum in biofilm and planktonic states and investigation of its intestinal modulation and immunoregulation in dogs
Source: Royal Society of Chemistry journal article supplement (doi:10.1039/d1fo00905b), 2021-01-01
Supplement: d1fo00905b1.pdf [file d1fo00905b1.pdf]

Table S1 Classification of differential metabolites

| Ion mode | SuperClass                              | Class                            | SubClass                                  | description                      | VIP   | Fold change |
|----------|-----------------------------------------|----------------------------------|-------------------------------------------|----------------------------------|-------|-------------|
| Positive | Organic acids and derivatives           | Keto acids and derivatives       | Short-chain keto acids and derivatives    | Dihydroxyfumarate                | 2.03  | 144.01      |
|          | Organic oxygen compounds                | Organooxygen compounds           | Carbohydrates and carbohydrate conjugates | L-Fucose-1-phosphate             | 2.15  | 52.37       |
|          | Benzenoids                              | Phenols                          | Methoxyphenols                            | Vanillin                         | 2.29  | 21.00       |
|          | Organic acids and derivatives           | Carboxylic acids and derivatives | Amino acids, peptides, and analogues      | D-Alanyl-D-alanine (D-Ala-D-Ala) | 1.24  | 11.21       |
|          | Organic nitrogen compounds              | Organonitrogen compounds         | Quaternary ammonium salts                 | Acetylcholine                    | 20.04 | 7.54        |
|          | Nucleosides, nucleotides, and analogues | Purine nucleotides               | Purine ribonucleotides                    | Guanosine 5'-diphosphate (GDP)   | 1.07  | 7.39        |
|          | Organic nitrogen compounds              | Organonitrogen compounds         | Quaternary ammonium salts                 | Phosphorylcholine                | 5.50  | 7.12        |
|          | Lipids and lipid-like molecules         | Glycerophospholipids             | Glycerophosphates                         | Glycerol 3-phosphate             | 4.28  | 6.62        |
|          | Organic oxygen compounds                | Organooxygen compounds           | Carbonyl compounds                        | Diacetyl                         | 8.90  | 6.47        |
|          | Organic nitrogen compounds              | Organonitrogen compounds         | Cyclohexylamines                          | Cyclohexylamine                  | 12.77 | 5.98        |

|                                         |                                  |                                           |                                  |       |      |
|-----------------------------------------|----------------------------------|-------------------------------------------|----------------------------------|-------|------|
| Organic nitrogen compounds              | Organonitrogen compounds         | Quaternary ammonium salts                 | Choline                          | 1.86  | 5.77 |
| Organic oxygen compounds                | Organooxygen compounds           | Carbohydrates and carbohydrate conjugates | alpha-D-Glucose 1-phosphate      | 1.83  | 5.47 |
| Organic oxygen compounds                | Organooxygen compounds           | Carbohydrates and carbohydrate conjugates | Glyceraldehyde 3-phosphate       | 4.36  | 4.84 |
| Lipids and lipid-like molecules         | Glycerophospholipids             | Glycerophosphocholines                    | Glycerophosphocholine            | 1.04  | 4.71 |
| Organic oxygen compounds                | Organooxygen compounds           | Carbohydrates and carbohydrate conjugates | D-Glucose 6-phosphate            | 1.04  | 4.53 |
| Organic acids and derivatives           | Carboxylic acids and derivatives | Amino acids, peptides, and analogues      | gamma-L-Glutamyl-L-glutamic acid | 2.82  | 4.44 |
| Nucleosides, nucleotides, and analogues | 5'-deoxyribonucleosides          | 5'-deoxy-5'-thionucleosides               | S-Methyl-5'-thioadenosine        | 16.87 | 4.05 |
| Organic acids and derivatives           | Carboxylic acids and derivatives | Amino acids, peptides, and analogues      | L-Citrulline                     | 5.43  | 3.98 |
| Organic acids and derivatives           | Carboxylic acids and derivatives | Amino acids, peptides, and analogues      | L-Glutamate                      | 1.32  | 3.82 |
| Organic acids and derivatives           | Carboxylic acids and derivatives | Amino acids, peptides, and analogues      | gamma-L-Glutamyl-L-valine        | 1.34  | 3.75 |
| Organic acids and derivatives           | Carboxylic acids and derivatives | Amino acids, peptides, and analogues      | L-Pipecolic acid                 | 3.00  | 3.71 |
| Nucleosides, nucleotides, and analogues | Pyrimidine nucleotides           | Pyrimidine ribonucleotides                | Uridine 5'-diphosphate (UDP)     | 1.09  | 3.59 |
| Organic acids and derivatives           | Carboxylic acids and derivatives | Amino acids, peptides, and analogues      | L-Proline                        | 1.42  | 3.57 |
| Organoheterocyclic compounds            | Indoles and derivatives          | Indolyl carboxylic acids and derivatives  | L-Tryptophan                     | 3.05  | 3.54 |

|                                         |                                  |                                      |                                         |      |      |
|-----------------------------------------|----------------------------------|--------------------------------------|-----------------------------------------|------|------|
| Organic acids and derivatives           | Carboxylic acids and derivatives | Amino acids, peptides, and analogues | L-Arginine                              | 8.22 | 3.53 |
| Organic acids and derivatives           | Carboxylic acids and derivatives | Amino acids, peptides, and analogues | N6,N6,N6-Trimethyl-L-lysine             | 2.55 | 3.52 |
| Lipids and lipid-like molecules         | Fatty Acyls                      | Fatty acid esters                    | Acetylcarnitine                         | 1.96 | 2.90 |
| Organic acids and derivatives           | Carboxylic acids and derivatives | Amino acids, peptides, and analogues | Creatinine                              | 4.77 | 2.81 |
| Organic acids and derivatives           | Carboxylic acids and derivatives | Amino acids, peptides, and analogues | L-Aspartate                             | 3.05 | 2.71 |
| Organic nitrogen compounds              | Organonitrogen compounds         | Quaternary ammonium salts            | L-Carnitine                             | 4.29 | 2.70 |
| Organic acids and derivatives           | Carboxylic acids and derivatives | Amino acids, peptides, and analogues | L-Histidine                             | 2.42 | 2.47 |
| Nucleosides, nucleotides, and analogues | 5'-deoxyribonucleosides          | 5'-deoxy-5'-thionucleosides          | S-Adenosylmethionine                    | 2.89 | 2.39 |
| Benzenoids                              | Phenols                          | Benzenediols                         | Dopamine                                | 1.53 | 2.39 |
| Organonitrogen compounds                | Amines                           | Alkanolamines                        | Triethanolamine                         | 4.69 | 2.30 |
| Organic acids and derivatives           | Carboxylic acids and derivatives | Amino acids, peptides, and analogues | 1-Aminocyclopropanecarboxylic acid      | 2.69 | 2.23 |
| Nucleosides, nucleotides, and analogues | (5'->5')-dinucleotides           |                                      | Nicotinamide adenine dinucleotide (NAD) | 8.13 | 2.10 |

|                                         |                                     |                                          |                                |      |      |
|-----------------------------------------|-------------------------------------|------------------------------------------|--------------------------------|------|------|
| Organic acids and derivatives           | Carboxylic acids and derivatives    | Amino acids, peptides, and analogues     | Creatine                       | 1.14 | 2.08 |
| Nucleosides, nucleotides, and analogues | Pyrimidine nucleotides              | Pyrimidine ribonucleotides               | Uridine 5'-monophosphate (UMP) | 1.83 | 1.94 |
| Organic acids and derivatives           | Carboxylic acids and derivatives    | Amino acids, peptides, and analogues     | Betaine                        | 4.91 | 1.86 |
| Nucleosides, nucleotides, and analogues | Purine nucleotides                  | Purine nucleotide sugars                 | ADP-ribose                     | 1.59 | 1.78 |
| Organoheterocyclic compounds            | Diazines                            | Pyrimidines and pyrimidine derivatives   | Uracil                         | 1.06 | 1.74 |
| Organic acids and derivatives           | Carboxylic acids and derivatives    | Amino acids, peptides, and analogues     | L-Methionine                   | 1.01 | 1.68 |
| Organic acids and derivatives           | Carboxylic acids and derivatives    | Amino acids, peptides, and analogues     | 3-Aminobutanoic acid           | 7.27 | 1.66 |
| Organic acids and derivatives           | Carboxylic acids and derivatives    | Amino acids, peptides, and analogues     | 4-Aminobutyric acid            | 1.01 | 1.64 |
| Organic acids and derivatives           | Carboxylic acids and derivatives    | Amino acids, peptides, and analogues     | N6-Methyl-L-lysine             | 1.13 | 1.63 |
| Organoheterocyclic compounds            | Pyridines and derivatives           | Pyridinecarboxylic acids and derivatives | Nicotinamide                   | 1.13 | 1.50 |
| Nucleosides, nucleotides, and analogues | Purine nucleotides                  | Purine ribonucleotides                   | Adenosine monophosphate (AMP)  | 1.79 | 1.49 |
| Organic acids and derivatives           | Carboxylic acids and derivatives    | Amino acids, peptides, and analogues     | L-Phenylalanine                | 2.65 | 1.42 |
| Benzenoids                              | Benzene and substituted derivatives | Phenethylamines                          | Tyramine                       | 3.50 | 1.41 |

---

|                                         |                                          |                                        |                                           |      |      |
|-----------------------------------------|------------------------------------------|----------------------------------------|-------------------------------------------|------|------|
| Nucleosides, nucleotides, and analogues | Pyrimidine nucleotides                   | Pyrimidine ribonucleotides             | Cytidine 5'-monophosphate (CMP)           | 1.26 | 1.34 |
| Organic acids and derivatives           | Carboxylic acids and derivatives         | Amino acids, peptides, and analogues   | L-Leucine                                 | 1.36 | 1.24 |
| Organoheterocyclic compounds            | Diazines                                 | Pyrimidines and pyrimidine derivatives | Cytosine                                  | 2.89 | 1.23 |
| Nucleosides, nucleotides, and analogues | Purine nucleotides                       | Purine ribonucleotides                 | Adenosine 5'-diphosphate (ADP)            | 1.08 | 1.22 |
| Organoheterocyclic compounds            | Imidazopyrimidines                       | Purines and purine derivatives         | 2-Hydroxyadenine                          | 2.93 | 0.95 |
| Nucleosides, nucleotides, and analogues | Purine nucleosides                       | Purine 2'-deoxyribonucleosides         | Deoxyadenosine                            | 6.22 | 0.24 |
| Nucleosides, nucleotides, and analogues | Purine nucleotides                       | Purine deoxyribonucleotides            | 2'-Deoxyadenosine 5'-monophosphate (dAMP) | 1.10 | 0.66 |
| Phenylpropanoids and polyketides        | Isoflavonoids                            | Isoflav-2-enes                         | Daidzein                                  | 1.57 | 0.61 |
| Organic acids and derivatives           | Peptidomimetics                          | Hybrid peptides                        | L-Carnosine                               | 1.04 | 0.59 |
| Organic acids and derivatives           | Carboxylic acids and derivatives         | Amino acids, peptides, and analogues   | Diaminopimelic acid                       | 6.46 | 0.56 |
| Organic acids and derivatives           | Organic phosphoric acids and derivatives | Phosphate esters                       | Phosphoenolpyruvate                       | 2.12 | 0.40 |
| Organic acids and derivatives           | Carboxylic acids and derivatives         | Amino acids, peptides, and analogues   | D-Proline                                 | 1.95 | 0.28 |

---

|          |                                 |                                  |                                           |                                   |       |        |
|----------|---------------------------------|----------------------------------|-------------------------------------------|-----------------------------------|-------|--------|
|          | Organic acids and derivatives   | Carboxylic acids and derivatives | Carboxylic acid derivatives               | N-Acetylcadaverine                | 3.30  | 0.28   |
|          | Organic oxygen compounds        | Organooxygen compounds           | Carbohydrates and carbohydrate conjugates | 3-Phospho-D-glycerate             | 2.79  | 0.44   |
|          | Organic oxygen compounds        | Organooxygen compounds           | Carbohydrates and carbohydrate conjugates | Isomaltose                        | 11.41 | 0.17   |
|          | Organic oxygen compounds        | Organooxygen compounds           | Carbohydrates and carbohydrate conjugates | Flavin adenine dinucleotide (FAD) | 1.84  | 0.75   |
| Negative | Organic oxygen compounds        | Organooxygen compounds           | Carbohydrates and carbohydrate conjugates | D-Ribulose 5-phosphate            | 4.39  | 103.88 |
|          | Organic acids and derivatives   | Keto acids and derivatives       | Short-chain keto acids and derivatives    | Dihydroxyfumarate                 | 1.19  | 80.53  |
|          | Organic oxygen compounds        | Organooxygen compounds           | Carbohydrates and carbohydrate conjugates | L-Rhamnose                        | 1.91  | 57.80  |
|          | Organic oxygen compounds        | Organooxygen compounds           | Carbohydrates and carbohydrate conjugates | 2-Deoxyribose 5-phosphate         | 1.23  | 23.38  |
|          | Lipids and lipid-like molecules | Fatty Acyls                      | Fatty acids and conjugates                | 16-Hydroxypalmitic acid           | 14.16 | 18.16  |
|          | Organic oxygen compounds        | Organooxygen compounds           | Carbohydrates and carbohydrate conjugates | D-Mannose                         | 12.82 | 13.08  |
|          | Organic acids and derivatives   | Carboxylic acids and derivatives | Dicarboxylic acids and derivatives        | Succinate                         | 3.17  | 12.34  |
|          | Organic acids and derivatives   | Carboxylic acids and derivatives | Tricarboxylic acids and derivatives       | Citrate                           | 7.60  | 12.13  |
|          | Organic oxygen compounds        | Organooxygen compounds           | Carbohydrates and carbohydrate conjugates | Alpha-D-Glucose                   | 4.77  | 10.95  |
|          | Organic oxygen compounds        | Organooxygen compounds           | Carbohydrates and carbohydrate conjugates | D-Tagatose                        | 3.52  | 9.70   |

---

|                                         |                                  |                                            |                                  |      |      |
|-----------------------------------------|----------------------------------|--------------------------------------------|----------------------------------|------|------|
| Nucleosides, nucleotides, and analogues | Flavin nucleotides               |                                            | Flavin mononucleotide (FMN)      | 1.06 | 8.48 |
| Organic acids and derivatives           | Hydroxy acids and derivatives    | Medium-chain hydroxy acids and derivatives | Galactonic acid                  | 1.25 | 8.30 |
| Organic oxygen compounds                | Organooxygen compounds           | Carbohydrates and carbohydrate conjugates  | Maltotriose                      | 1.07 | 8.21 |
| Nucleosides, nucleotides, and analogues | Purine nucleotides               | Purine nucleotide sugars                   | ADP-glucose                      | 1.14 | 8.08 |
| Organic oxygen compounds                | Organooxygen compounds           | Carbohydrates and carbohydrate conjugates  | 1-Deoxy-D-xylulose 5-phosphate   | 1.43 | 7.10 |
| Lipids and lipid-like molecules         | Fatty Acyls                      | Fatty acids and conjugates                 | cis-9-Palmitoleic acid           | 9.81 | 6.44 |
| Organic acids and derivatives           | Hydroxy acids and derivatives    | Short-chain hydroxy acids and derivatives  | (S)-2-Hydroxyglutarate           | 2.95 | 6.26 |
| Organic acids and derivatives           | Carboxylic acids and derivatives | Amino acids, peptides, and analogues       | 5-L-Glutamyl-L-alanine           | 1.40 | 5.85 |
| Organic oxygen compounds                | Organooxygen compounds           | Carbohydrates and carbohydrate conjugates  | D-Mannose 1-phosphate            | 2.39 | 5.67 |
| Organic oxygen compounds                | Organooxygen compounds           | Carbohydrates and carbohydrate conjugates  | L-Threonate                      | 2.05 | 5.57 |
| Organic acids and derivatives           | Carboxylic acids and derivatives | Amino acids, peptides, and analogues       | N-Formylmethionine               | 2.93 | 5.54 |
| Lipids and lipid-like molecules         | Fatty Acyls                      | Eicosanoids                                | Guanosine 5'-monophosphate (GMP) | 1.09 | 5.34 |
| Organic nitrogen compounds              | Organonitrogen compounds         | Quaternary ammonium salts                  | Phosphorylcholine                | 5.30 | 5.15 |

---

---

|                                         |                                  |                                           |                                            |      |      |
|-----------------------------------------|----------------------------------|-------------------------------------------|--------------------------------------------|------|------|
| Organic acids and derivatives           | Carboxylic acids and derivatives | Amino acids, peptides, and analogues      | L-Pyroglutamic acid                        | 1.27 | 4.93 |
| Organic acids and derivatives           | Carboxylic acids and derivatives | Amino acids, peptides, and analogues      | N-Acetyl-L-glutamate                       | 1.77 | 4.89 |
| Organoheterocyclic compounds            | Pyridines and derivatives        | Pyridinecarboxylic acids and derivatives  | Nicotinate                                 | 1.19 | 4.88 |
| Lipids and lipid-like molecules         | Fatty Acyls                      | Fatty acids and conjugates                | 3-Hydroxy-3-methylglutaric acid            | 1.58 | 4.85 |
| Organic acids and derivatives           | Carboxylic acids and derivatives | Amino acids, peptides, and analogues      | L-Histidine                                | 2.73 | 4.81 |
| Organic acids and derivatives           | Carboxylic acids and derivatives | Amino acids, peptides, and analogues      | gamma-L-Glutamyl-L-glutamic acid           | 1.22 | 4.49 |
| Organic acids and derivatives           | Hydroxy acids and derivatives    | Beta hydroxy acids and derivatives        | 3-Hydroxypropionic acid (beta-lactic acid) | 1.29 | 4.47 |
| Lipids and lipid-like molecules         | Glycerophospholipids             | Glycerophosphates                         | Glycerol 3-phosphate                       | 7.42 | 4.38 |
| Organic oxygen compounds                | Organooxygen compounds           | Carbohydrates and carbohydrate conjugates | D-Erythrose 4-phosphate                    | 2.06 | 3.98 |
| Organoheterocyclic compounds            | Indoles and derivatives          | Indolyl carboxylic acids and derivatives  | L-Tryptophan                               | 3.62 | 3.90 |
| Organoheterocyclic compounds            | Indoles and derivatives          | Indolyl carboxylic acids and derivatives  | Indolelactic acid                          | 3.64 | 3.88 |
| Nucleosides, nucleotides, and analogues | 5'-deoxyribonucleosides          | 5'-deoxy-5'-thionucleosides               | S-Methyl-5'-thioadenosine                  | 7.82 | 3.71 |

---



|                                         |                                  |                                            |                                  |       |      |
|-----------------------------------------|----------------------------------|--------------------------------------------|----------------------------------|-------|------|
| Organic acids and derivatives           | Carboxylic acids and derivatives | Amino acids, peptides, and analogues       | Creatinine                       | 1.16  | 3.15 |
| Lipids and lipid-like molecules         | Fatty Acyls                      | Fatty acids and conjugates                 | Dodecanoic acid                  | 3.96  | 2.97 |
| Lipids and lipid-like molecules         | Fatty Acyls                      | Fatty acids and conjugates                 | Myristic acid                    | 2.47  | 2.97 |
| Organic acids and derivatives           | Hydroxy acids and derivatives    | Medium-chain hydroxy acids and derivatives | 3-Hydroxydodecanoic acid         | 1.51  | 2.91 |
| Lipids and lipid-like molecules         | Fatty Acyls                      | Fatty acids and conjugates                 | Palmitic acid                    | 22.88 | 2.90 |
| Organic oxygen compounds                | Organooxygen compounds           | Carbohydrates and carbohydrate conjugates  | Ribitol                          | 2.16  | 2.78 |
| Organic acids and derivatives           | Carboxylic acids and derivatives | Amino acids, peptides, and analogues       | L-Glutamate                      | 12.48 | 2.64 |
| Organic acids and derivatives           | Carboxylic acids and derivatives | Amino acids, peptides, and analogues       | L-Alanine                        | 3.81  | 2.57 |
| Organic oxygen compounds                | Organooxygen compounds           | Carbohydrates and carbohydrate conjugates  | L-Fucose-1-phosphate             | 1.13  | 2.53 |
| Nucleosides, nucleotides, and analogues | Purine nucleotides               | Purine ribonucleotides                     | Adenosine monophosphate<br>(AMP) | 6.27  | 2.44 |
| Organic nitrogen compounds              | Organonitrogen compounds         | Quaternary ammonium salts                  | L-Carnitine                      | 1.09  | 2.40 |
| Organic acids and derivatives           | Carboxylic acids and derivatives | Amino acids, peptides, and analogues       | D-Aspartic acid                  | 6.33  | 2.12 |
| Phenylpropanoids and polyketides        | Phenylpropanoic acids            |                                            | Hydroxyphenyllactic acid         | 2.53  | 1.98 |
| Nucleosides, nucleotides, and analogues | (5'→5')-dinucleotides            |                                            | Nicotinamide adenine             | 4.55  | 1.96 |

---

|                                         |                                  |                                         |                                   |       |      |
|-----------------------------------------|----------------------------------|-----------------------------------------|-----------------------------------|-------|------|
|                                         |                                  |                                         | dinucleotide (NAD)                |       |      |
| Organic acids and derivatives           | Carboxylic acids and derivatives | Amino acids, peptides, and analogues    | N-Acetyl-L-aspartic acid          | 1.54  | 1.87 |
| Nucleosides, nucleotides, and analogues | Pyrimidine nucleotides           | Pyrimidine ribonucleotides              | Uridine 5'-monophosphate (UMP)    | 2.60  | 1.84 |
| Nucleosides, nucleotides, and analogues | Pyrimidine nucleotides           | Pyrimidine ribonucleotides              | Uridine 5'-diphosphate (UDP)      | 1.46  | 1.80 |
| Organic acids and derivatives           | Carboxylic acids and derivatives | Amino acids, peptides, and analogues    | L-Valine                          | 1.81  | 1.63 |
| Nucleosides, nucleotides, and analogues | Purine nucleotides               | Purine ribonucleotides                  | Adenosine 3',5'-diphosphate (PAP) | 2.15  | 1.60 |
| Organic acids and derivatives           | Carboxylic acids and derivatives | Amino acids, peptides, and analogues    | L-Phenylalanine                   | 2.76  | 1.60 |
| Organoheterocyclic compounds            | Diazines                         | Pyrimidines and pyrimidine derivatives  | Uracil                            | 6.14  | 1.48 |
| Nucleosides, nucleotides, and analogues | Pyrimidine nucleotides           | Pyrimidine nucleotide sugars            | UDP-N-acetylglucosamine           | 2.10  | 1.43 |
| Organic acids and derivatives           | Keto acids and derivatives       | Medium-chain keto acids and derivatives | 2-Oxoadipic acid                  | 4.28  | 1.07 |
| Organoheterocyclic compounds            | Lactones                         | Gamma butyrolactones                    | L-Gulonic gamma-lactone           | 1.21  | 0.82 |
| Lipids and lipid-like molecules         | Fatty Acyls                      | Linoleic acids and derivatives          | Linoleic acid                     | 25.09 | 0.75 |
| Organoheterocyclic compounds            | Diazines                         | Pyrimidines and pyrimidine derivatives  | Dihydrouracil                     | 1.03  | 0.59 |

---

|                                         |                                          |                                           |                                            |       |      |
|-----------------------------------------|------------------------------------------|-------------------------------------------|--------------------------------------------|-------|------|
| Organic acids and derivatives           | Hydroxy acids and derivatives            | Alpha hydroxy acids and derivatives       | DL-lactate                                 | 1.09  | 0.57 |
| Organic acids and derivatives           | Carboxylic acids and derivatives         | Amino acids, peptides, and analogues      | Diaminopimelic acid                        | 7.61  | 0.56 |
| Nucleosides, nucleotides, and analogues | Purine nucleotides                       | Purine deoxyribonucleotides               | Deoxyguanosine triphosphate (dGTP)         | 1.52  | 0.48 |
| Organic acids and derivatives           | Carboxylic acids and derivatives         | Amino acids, peptides, and analogues      | L-Glutamine                                | 2.27  | 0.45 |
| Organic acids and derivatives           | Carboxylic acids and derivatives         | Amino acids, peptides, and analogues      | Acetylglycine                              | 1.05  | 0.45 |
| Organic acids and derivatives           | Organic phosphoric acids and derivatives | Phosphate esters                          | Phosphoenolpyruvate                        | 2.78  | 0.43 |
| Organic oxygen compounds                | Organooxygen compounds                   | Carbohydrates and carbohydrate conjugates | Dihydroxyacetone phosphate                 | 2.77  | 0.40 |
| Nucleosides, nucleotides, and analogues | Pyrimidine nucleotides                   | Pyrimidine nucleotide sugars              | Uridine diphosphate glucose(UDP-D-Glucose) | 2.72  | 0.33 |
| Organic oxygen compounds                | Organooxygen compounds                   | Carbohydrates and carbohydrate conjugates | Fructose 1-phosphate                       | 1.12  | 0.27 |
| Organoheterocyclic compounds            | Diazines                                 | Pyrimidines and pyrimidine derivatives    | Thymine                                    | 3.53  | 0.20 |
| Organic oxygen compounds                | Organooxygen compounds                   | Carbohydrates and carbohydrate conjugates | Galactinol                                 | 19.42 | 0.18 |
| Lipids and lipid-like molecules         | Fatty Acyls                              | Fatty acids and conjugates                | 2-Methyl-3-hydroxybutyric acid             | 2.53  | 0.17 |
