# Supplementary material for: Metabolic profiles of Lactobacillus paraplantarum in biofilm and planktonic states and investigation of its intestinal modulation and immunoregulation in dogs
Source: Royal Society of Chemistry journal article supplement (doi:10.1039/d1fo00905b), 2021-01-01
Supplement: d1fo00905b2.pdf [file d1fo00905b2.pdf]

Table S2 List of substances for correlation analysis

| Category             | Number | Substance               |
|----------------------|--------|-------------------------|
| microbiota diversity | G01    | <i>Adlercreutzia</i>    |
|                      | G02    | <i>Allobaculum</i>      |
|                      | G03    | <i>Bacteroides</i>      |
|                      | G04    | <i>Blautia</i>          |
|                      | G05    | <i>Bulleidia</i>        |
|                      | G06    | <i>Butyricicoccus</i>   |
|                      | G07    | <i>Cetobacterium</i>    |
|                      | G08    | <i>Clostridium</i>      |
|                      | G09    | <i>Collinsella</i>      |
|                      | G10    | <i>Coprococcus</i>      |
|                      | G11    | <i>Dialister</i>        |
|                      | G12    | <i>Enterococcus</i>     |
|                      | G13    | <i>Escherichia</i>      |
|                      | G14    | <i>Eubacterium</i>      |
|                      | G15    | <i>Faecalibacterium</i> |
|                      | G16    | <i>Gemmiger</i>         |
|                      | G17    | <i>Lactobacillus</i>    |
|                      | G18    | <i>Oscillospira</i>     |
|                      | G19    | <i>Prevotella</i>       |
|                      | G20    | <i>Ruminococcus</i>     |
|                      | G21    | <i>Slackia</i>          |
|                      | G22    | <i>Streptococcus</i>    |

---

|     |                                     |
|-----|-------------------------------------|
| G23 | <i>Turicibacter</i>                 |
| G24 | <i>Anaerobiospirillum</i>           |
| G25 | <i>Veillonella</i>                  |
| G26 | <i>Megamonas</i>                    |
| G27 | <i>Peptococcus</i>                  |
| G28 | <i>Catenibacterium</i>              |
| G29 | <i>Dorea</i>                        |
| G30 | <i>Fusobacterium</i>                |
| S01 | <i>Bacteroides coprophilus</i>      |
| S02 | <i>Bacteroides plebeius</i>         |
| S03 | <i>Bifidobacterium adolescentis</i> |
| S04 | <i>Blautia producta</i>             |
| S05 | <i>Bulleidia p-1630-c5</i>          |
| S06 | <i>Butyricicoccus pullicaecorum</i> |
| S07 | <i>Clostridium clostridioforme</i>  |
| S08 | <i>Clostridium spiroforme</i>       |
| S09 | <i>Collinsella stercoris</i>        |
| S10 | <i>Enterococcus cecorum</i>         |
| S11 | <i>Eubacterium bifforme</i>         |
| S12 | <i>Faecalibacterium prausnitzii</i> |
| S13 | <i>Gemmiger formicilis</i>          |
| S14 | <i>Lactobacillus helveticus</i>     |
| S15 | <i>Prevotella copri</i>             |
| S16 | <i>Ruminococcus torques</i>         |

---

---

|             |     |                                    |
|-------------|-----|------------------------------------|
|             | S17 | <i>Cetobacterium somerae</i>       |
|             | S18 | <i>Ruminococcus gnavus</i>         |
|             | S19 | Other(<0.0005)                     |
| metabolites | M01 | L-Citrulline                       |
|             | M02 | Cyclohexylamine                    |
|             | M03 | gamma-L-Glutamyl-L-phenylalanine   |
|             | M04 | P-Fluorophenylalanine              |
|             | M05 | Choline                            |
|             | M06 | 3.alpha.-Mannobiose                |
|             | M07 | Glycerol 3-phosphate               |
|             | M08 | Ser-Asp                            |
|             | M09 | Phosphorylcholine                  |
|             | M10 | Glutaraldehyde                     |
|             | M11 | Ala-Asp                            |
|             | M12 | Isomaltose                         |
|             | M13 | Ile-Glu                            |
|             | M14 | Guanosine 5'-diphosphate (GDP)     |
|             | M15 | D-Fructose 1,6-bisphosphate        |
|             | M16 | Thr-Glu                            |
|             | M17 | Glyceraldehyde 3-phosphate         |
|             | M18 | gamma-L-Glutamyl-L-valine          |
|             | M19 | 1-Aminocyclopropanecarboxylic acid |
|             | M20 | Vanillin                           |
|             | M21 | DL-Indole-3-lactic acid            |

---

---

|     |                                         |
|-----|-----------------------------------------|
| M22 | L-Carnitine                             |
| M23 | Creatinine                              |
| M24 | Ala-Glu                                 |
| M25 | L-Aspartate                             |
| M26 | 2'-O-methylcytidine                     |
| M27 | Uridine 5'-diphosphate (UDP)            |
| M28 | alpha-D-Glucose 1-phosphate             |
| M29 | L-Tryptophan                            |
| M30 | Deoxyadenosine                          |
| M31 | gamma-L-Glutamyl-L-glutamic acid        |
| M32 | Dihydroxyfumarate                       |
| M33 | Creatine                                |
| M34 | Ile-Asp                                 |
| M35 | D-Alanyl-D-alanine (D-Ala-D-Ala)        |
| M36 | Uridine 5'-monophosphate (UMP)          |
| M37 | L-Pipecolic acid                        |
| M38 | Nicotinamide adenine dinucleotide (NAD) |
| M39 | Arg-Glu                                 |
| M40 | L-Glutamate                             |
| M41 | ADP-ribose                              |
| M42 | Norharmaline                            |
| M43 | Diaminopimelic acid                     |
| M44 | N6,N6,N6-Trimethyl-L-lysine             |
| M45 | Acetylcholine                           |

---

---

|     |                                           |
|-----|-------------------------------------------|
| M46 | D-Glucose 6-phosphate                     |
| M47 | 4-Aminobutyric acid                       |
| M48 | Stearidonic Acid                          |
| M49 | Diacyl                                    |
| M50 | N-Acetylcadaverine                        |
| M51 | N6-Acetyl-L-lysine                        |
| M52 | D-Proline                                 |
| M53 | 3-Phospho-D-glycerate                     |
| M54 | (3-Carboxypropyl)trimethylammonium cation |
| M55 | Tyramine                                  |
| M56 | N-Acetyl-L-Histidine                      |
| M57 | D-Pipecolinic acid                        |
| M58 | Phosphoenolpyruvate                       |
| M59 | Dopamine                                  |
| M60 | 4-Hydroxybutanoic acid lactone            |
| M61 | Flavin adenine dinucleotide (FAD)         |
| M62 | L-Tyrosine                                |
| M63 | Ser-Glu                                   |
| M64 | L-Methionine                              |
| M65 | L-Phenylalanine                           |
| M66 | Adenosine monophosphate (AMP)             |
| M67 | N6-Methyl-L-lysine                        |
| M68 | trans-2-Hydroxycinnamic acid              |
| M69 | 2'-Deoxyadenosine 5'-monophosphate (dAMP) |

---

---

|     |                                        |
|-----|----------------------------------------|
| M70 | L-Carnosine                            |
| M71 | Adenine                                |
| M72 | L-Fucose-1-phosphate                   |
| M73 | S-Methyl-5'-thioadenosine              |
| M74 | His-Pro                                |
| M75 | Cytosine                               |
| M76 | Triethanolamine                        |
| M77 | Daidzein                               |
| M78 | L- .alpha.-Amino-.gamma.-butyrolactone |
| M79 | Cytidine 5'-monophosphate (CMP)        |
| M80 | Glycerophosphocholine                  |
| M81 | Phe-Gln                                |
| M82 | L-Leucine                              |
| M83 | 3-Aminobutanoic acid                   |
| M84 | Dimethylaminopurine                    |
| M85 | Nicotinamide                           |
| M86 | L-Arginine                             |
| M87 | Acetylcarnitine                        |
| M88 | S-Adenosylmethionine                   |
| M89 | L-Proline                              |
| M90 | Adenosine 5'-diphosphate (ADP)         |
| M91 | His-Ile                                |
| M92 | L-Histidine                            |
| M93 | Uracil                                 |

---

---

|      |                                            |
|------|--------------------------------------------|
| M94  | 2-Hydroxyadenine                           |
| M95  | Betaine                                    |
| M96  | 16-Hydroxypalmitic acid                    |
| M97  | 1-Deoxy-D-xylulose 5-phosphate             |
| M98  | N-Acetyl-D-lactosamine                     |
| M99  | L-Pyroglutamic acid                        |
| M100 | D-Tagatose                                 |
| M101 | D-Mannose                                  |
| M102 | D-Mannose 1-phosphate                      |
| M103 | 3-Hydroxy-3-methylglutaric acid            |
| M104 | Guanosine 5'-monophosphate (GMP)           |
| M105 | Nicotinate                                 |
| M106 | 2-Deoxyribose 5-phosphate                  |
| M107 | Flavin mononucleotide (FMN)                |
| M108 | N-Formylmethionine                         |
| M109 | 2-Dehydro-3-deoxy-D-gluconate              |
| M110 | 3-Hydroxypropionic acid (beta-lactic acid) |
| M111 | Ribitol                                    |
| M112 | Galactinol                                 |
| M113 | D-Ribulose 5-phosphate                     |
| M114 | Adenosine 3',5'-diphosphate (PAP)          |
| M115 | ADP-glucose                                |
| M116 | Palmitic acid                              |
| M117 | Cyclic adenosine diphosphate ribose        |

---

---

|      |                                            |
|------|--------------------------------------------|
| M118 | D-Aspartic acid                            |
| M119 | N-Acetyl-L-aspartic acid                   |
| M120 | N-Acetyl-L-glutamate                       |
| M121 | UDP-N-acetylmuramate                       |
| M122 | Fructose 1-phosphate                       |
| M123 | Maltotriose                                |
| M124 | L-Alanine                                  |
| M125 | L-Threonine                                |
| M126 | L-Threonate                                |
| M127 | D-Arabinono-1,4-lactone                    |
| M128 | L-Valine                                   |
| M129 | Thymine                                    |
| M130 | D-Erythrose 4-phosphate                    |
| M131 | L-Rhamnose                                 |
| M132 | D-Ribulose 1,5-bisphosphate                |
| M133 | Uridine diphosphate glucose(UDP-D-Glucose) |
| M134 | Alpha-D-Glucose                            |
| M135 | 2-Methyl-3-hydroxybutyric acid             |
| M136 | Deoxyguanosine triphosphate (dGTP)         |
| M137 | Dihydrouracil                              |
| M138 | Dodecanoic acid                            |
| M139 | Succinate                                  |
| M140 | Ribulose 5-phosphate                       |
| M141 | Galactonic acid                            |

---



---

|      |                                 |
|------|---------------------------------|
| M142 | cis-9-Palmitoleic acid          |
| M143 | L-Glutamine                     |
| M144 | Dihydroxyacetone phosphate      |
| M145 | 5-L-Glutamyl-L-alanine          |
| M146 | Norethindrone Acetate           |
| M147 | L-Asparagine                    |
| M148 | 3-Hydroxydodecanoic acid        |
| M149 | 9,10-DiHOME                     |
| M150 | DL-lactate                      |
| M151 | Citrate                         |
| M152 | Myristic acid                   |
| M153 | myo-Inositol                    |
| M154 | UDP-N-acetylglucosamine         |
| M155 | 9R,10S-EpOME                    |
| M156 | (S)-2-Hydroxyglutarate          |
| M157 | Indolelactic acid               |
| M158 | all cis-(6,9,12)-Linolenic acid |
| M159 | Hydroxyphenyllactic acid        |
| M160 | Lumichrome                      |
| M161 | Acetylglycine                   |
| M162 | Linoleic acid                   |
| M163 | 2E-Eicosenoic acid              |
| M164 | L-Gulonic gamma-lactone         |
| M165 | 2-Oxoadipic acid                |

---

---

M166

Oleic acid

M167

Sucrose

---
