# Supplementary material for: Metabolic profiles of Lactobacillus paraplantarum in biofilm and planktonic states and investigation of its intestinal modulation and immunoregulation in dogs
Source: Royal Society of Chemistry journal article supplement (doi:10.1039/d1fo00905b), 2021-01-01
Supplement: d1fo00905b3.pdf [file d1fo00905b3.pdf]

Table S3 The correlation analysis between L-ZS9-producing metabolites, microbiota diversity and immune factors at the positive ion mode.

| Var 1                | Interaction | Var 2                               | Cor     | P value |
|----------------------|-------------|-------------------------------------|---------|---------|
| IgG                  | Positive    | <i>Bifidobacterium adolescentis</i> | 0.8328  | 0.0028  |
| MDA                  | Positive    | <i>Clostridium clostridioforme</i>  | 0.7128  | 0.0207  |
| sIgA                 | Positive    | <i>Gemmiger formicilis</i>          | 0.7333  | 0.0158  |
| IgG                  | Positive    | <i>Enterococcus cecorum</i>         | 0.6687  | 0.0345  |
| MDA                  | Negative    | <i>Enterococcus cecorum</i>         | -0.6848 | 0.0289  |
| sIgA                 | Positive    | <i>Eubacterium bifforme</i>         | 0.6970  | 0.0251  |
| sIgA                 | Positive    | <i>Ruminococcus torques</i>         | 0.6606  | 0.0376  |
| sIgA                 | Positive    | <i>Blautia producta</i>             | 0.7697  | 0.0092  |
| T-SOD                | Positive    | <i>Cetobacterium somerae</i>        | 0.6727  | 0.0330  |
| sIgA                 | Positive    | <i>Collinsella stercoris</i>        | 0.6485  | 0.0425  |
| sIgA                 | Positive    | <i>Faecalibacterium prausnitzii</i> | 0.8424  | 0.0022  |
| sIgA                 | Negative    | <i>Prevotella copri</i>             | -0.6606 | 0.0376  |
| sIgA                 | Positive    | <i>Coprococcus</i>                  | 0.6606  | 0.0376  |
| TNF- $\alpha$        | Positive    | <i>Peptococcus</i>                  | 0.6485  | 0.0425  |
| sIgA                 | Positive    | <i>Slackia</i>                      | 0.6970  | 0.0251  |
| T-SOD                | Positive    | <i>Anaerobiospirillum</i>           | 0.6727  | 0.0330  |
| MDA                  | Negative    | <i>Oscillospira</i>                 | -0.7091 | 0.0217  |
| T-SOD                | Positive    | <i>Catenibacterium</i>              | 0.8283  | 0.0031  |
| sIgA                 | Positive    | <i>Gemmiger</i>                     | 0.7576  | 0.0111  |
| IgG                  | Positive    | <i>Enterococcus</i>                 | 0.6322  | 0.0498  |
| sIgA                 | Positive    | <i>Enterococcus</i>                 | 0.6485  | 0.0425  |
| MDA                  | Negative    | <i>Enterococcus</i>                 | -0.7697 | 0.0092  |
| sIgA                 | Positive    | <i>Dialister</i>                    | 0.6364  | 0.0479  |
| sIgA                 | Positive    | <i>Eubacterium</i>                  | 0.7697  | 0.0092  |
| IgG                  | Positive    | <i>Veillonella</i>                  | 0.7599  | 0.0108  |
| sIgA                 | Positive    | <i>Adlercreutzia</i>                | 0.6970  | 0.0251  |
| MDA                  | Negative    | <i>Streptococcus</i>                | -0.6485 | 0.0425  |
| MDA                  | Negative    | <i>Escherichia</i>                  | -0.6485 | 0.0425  |
| sIgA                 | Positive    | <i>Blautia</i>                      | 0.7333  | 0.0158  |
| sIgA                 | Positive    | <i>Faecalibacterium</i>             | 0.8424  | 0.0022  |
| sIgA                 | Positive    | <i>Collinsella</i>                  | 0.7212  | 0.0186  |
| sIgA                 | Positive    | <i>Lactobacillus</i>                | 0.8424  | 0.0022  |
| MDA                  | Negative    | <i>Prevotella</i>                   | -0.6485 | 0.0425  |
| sIgA                 | Positive    | <i>Allobaculum</i>                  | 0.7212  | 0.0186  |
| <i>Lactobacillus</i> | Negative    | 3-Phospho-D-glycerate               | -0.9152 | 0.0002  |
| <i>Lactobacillus</i> | Negative    | N-Acetylcadaverine                  | -0.9030 | 0.0003  |
| <i>Lactobacillus</i> | Negative    | Stearidonic Acid                    | -0.8909 | 0.0005  |
| <i>Lactobacillus</i> | Negative    | Phosphoenolpyruvate                 | -0.8788 | 0.0008  |
| <i>Lactobacillus</i> | Positive    | L-Tyrosine                          | 0.8667  | 0.0012  |
| <i>Lactobacillus</i> | Positive    | Acetylcarnitine                     | 0.8667  | 0.0012  |
| <i>Lactobacillus</i> | Positive    | trans-2-Hydroxycinnamic acid        | 0.8545  | 0.0016  |

|                                     |          |                                           |         |        |
|-------------------------------------|----------|-------------------------------------------|---------|--------|
| <i>Faecalibacterium prausnitzii</i> | Positive | Choline                                   | 0.8424  | 0.0022 |
| <i>Faecalibacterium</i>             | Positive | Choline                                   | 0.8424  | 0.0022 |
| <i>Lactobacillus</i>                | Negative | Deoxyadenosine                            | -0.8424 | 0.0022 |
| <i>Lactobacillus</i>                | Positive | D-Alanyl-D-alanine (D-Ala-D-Ala)          | 0.8424  | 0.0022 |
| <i>Ruminococcus torques</i>         | Negative | 2'-Deoxyadenosine 5'-monophosphate (dAMP) | -0.8424 | 0.0022 |
| <i>Prevotella copri</i>             | Positive | 2'-Deoxyadenosine 5'-monophosphate (dAMP) | 0.8424  | 0.0022 |
| <i>Lactobacillus</i>                | Positive | gamma-L-Glutamyl-L-glutamic acid          | 0.8303  | 0.0029 |
| <i>Lactobacillus</i>                | Negative | Diaminopimelic acid                       | -0.8303 | 0.0029 |
| <i>Blautia producta</i>             | Negative | N-Acetylcadaverine                        | -0.8303 | 0.0029 |
| <i>Allobaculum</i>                  | Negative | 2'-Deoxyadenosine 5'-monophosphate (dAMP) | -0.8303 | 0.0029 |
| <i>Prevotella copri</i>             | Negative | Diacetyl                                  | -0.8182 | 0.0038 |
| <i>Lactobacillus</i>                | Negative | D-Proline                                 | -0.8182 | 0.0038 |
| <i>Lactobacillus</i>                | Negative | 2'-Deoxyadenosine 5'-monophosphate (dAMP) | -0.8182 | 0.0038 |
| <i>Lactobacillus</i>                | Positive | 3-Aminobutanoic acid                      | 0.8182  | 0.0038 |
| <i>Ruminococcus torques</i>         | Positive | L-Citrulline                              | 0.8061  | 0.0049 |
| <i>Lactobacillus</i>                | Positive | Glutaraldehyde                            | 0.8061  | 0.0049 |
| <i>Prevotella copri</i>             | Negative | L-Glutamate                               | -0.8061 | 0.0049 |
| <i>Blautia producta</i>             | Negative | 2'-Deoxyadenosine 5'-monophosphate (dAMP) | -0.8061 | 0.0049 |
| <i>Eubacterium</i>                  | Negative | 2'-Deoxyadenosine 5'-monophosphate (dAMP) | -0.8061 | 0.0049 |
| <i>Lactobacillus</i>                | Negative | L-Carnosine                               | -0.8061 | 0.0049 |
| <i>Lactobacillus</i>                | Positive | Cytosine                                  | 0.8061  | 0.0049 |
| <i>Lactobacillus</i>                | Negative | Daidzein                                  | -0.8061 | 0.0049 |
| <i>Eubacterium bifforme</i>         | Positive | Glutaraldehyde                            | 0.7939  | 0.0061 |
| <i>Ruminococcus torques</i>         | Positive | L-Glutamate                               | 0.7939  | 0.0061 |
| <i>Allobaculum</i>                  | Positive | L-Glutamate                               | 0.7939  | 0.0061 |
| <i>Ruminococcus torques</i>         | Positive | Acetylcholine                             | 0.7939  | 0.0061 |
| <i>Faecalibacterium prausnitzii</i> | Negative | Phosphoenolpyruvate                       | -0.7939 | 0.0061 |
| <i>Faecalibacterium</i>             | Negative | Phosphoenolpyruvate                       | -0.7939 | 0.0061 |
| <i>Lactobacillus</i>                | Positive | Dopamine                                  | 0.7939  | 0.0061 |
| <i>Lactobacillus</i>                | Negative | Flavin adenine dinucleotide (FAD)         | -0.7939 | 0.0061 |
| <i>Blautia</i>                      | Negative | 2'-Deoxyadenosine 5'-monophosphate (dAMP) | -0.7939 | 0.0061 |
| <i>Prevotella copri</i>             | Negative | Adenine                                   | -0.7939 | 0.0061 |
| Other(<0.0005)                      | Negative | 3-Aminobutanoic acid                      | -0.7939 | 0.0061 |
| <i>Clostridium spiroforme</i>       | Positive | Dopamine                                  | 0.7903  | 0.0065 |
| <i>Lactobacillus</i>                | Negative | D-Fructose 1,6-bisphosphate               | -0.7818 | 0.0075 |
| <i>Lactobacillus</i>                | Positive | L-Glutamate                               | 0.7818  | 0.0075 |
| <i>Lactobacillus</i>                | Positive | D-Glucose 6-phosphate                     | 0.7818  | 0.0075 |
| <i>Ruminococcus torques</i>         | Positive | Diacetyl                                  | 0.7818  | 0.0075 |
| <i>Gemmiger formicilis</i>          | Negative | N-Acetylcadaverine                        | -0.7818 | 0.0075 |
| <i>Eubacterium bifforme</i>         | Negative | N-Acetylcadaverine                        | -0.7818 | 0.0075 |
| Other(<0.0005)                      | Positive | Flavin adenine dinucleotide (FAD)         | 0.7818  | 0.0075 |
| <i>Bacteroides plebeius</i>         | Negative | Adenine                                   | -0.7818 | 0.0075 |
| <i>Lactobacillus helveticus</i>     | Negative | 2-Hydroxyadenine                          | -0.7818 | 0.0075 |
| <i>Blautia producta</i>             | Positive | L-Citrulline                              | 0.7697  | 0.0092 |

|                                     |          |                                           |         |        |
|-------------------------------------|----------|-------------------------------------------|---------|--------|
| <i>Lactobacillus</i>                | Negative | 3.alpha.-Mannobiose                       | -0.7697 | 0.0092 |
| <i>Gemmiger formicilis</i>          | Positive | Glutaraldehyde                            | 0.7697  | 0.0092 |
| <i>Ruminococcus torques</i>         | Positive | Creatine                                  | 0.7697  | 0.0092 |
| <i>Faecalibacterium prausnitzii</i> | Positive | Ile-Asp                                   | 0.7697  | 0.0092 |
| <i>Faecalibacterium</i>             | Positive | Ile-Asp                                   | 0.7697  | 0.0092 |
| <i>Bacteroides plebeius</i>         | Negative | Acetylcholine                             | -0.7697 | 0.0092 |
| <i>Lactobacillus</i>                | Positive | Acetylcholine                             | 0.7697  | 0.0092 |
| <i>Lactobacillus</i>                | Positive | Diacetyl                                  | 0.7697  | 0.0092 |
| <i>Eubacterium</i>                  | Negative | 3-Phospho-D-glycerate                     | -0.7697 | 0.0092 |
| <i>Eubacterium bifforme</i>         | Negative | 2'-Deoxyadenosine 5'-monophosphate (dAMP) | -0.7697 | 0.0092 |
| <i>Ruminococcus</i>                 | Negative | 2'-Deoxyadenosine 5'-monophosphate (dAMP) | -0.7697 | 0.0092 |
| <i>Bacteroides</i>                  | Negative | Adenine                                   | -0.7697 | 0.0092 |
| <i>Faecalibacterium prausnitzii</i> | Positive | Cytosine                                  | 0.7697  | 0.0092 |
| <i>Faecalibacterium</i>             | Positive | Cytosine                                  | 0.7697  | 0.0092 |
| <i>Bacteroides plebeius</i>         | Positive | 2-Hydroxyadenine                          | 0.7697  | 0.0092 |
| <i>Adlercreutzia</i>                | Positive | Choline                                   | 0.7576  | 0.0111 |
| <i>Gemmiger</i>                     | Positive | Glutaraldehyde                            | 0.7576  | 0.0111 |
| <i>Bacteroides plebeius</i>         | Negative | Thr-Glu                                   | -0.7576 | 0.0111 |
| <i>Lactobacillus</i>                | Positive | Ile-Asp                                   | 0.7576  | 0.0111 |
| <i>Blautia producta</i>             | Positive | L-Glutamate                               | 0.7576  | 0.0111 |
| <i>Ruminococcus</i>                 | Positive | L-Glutamate                               | 0.7576  | 0.0111 |
| <i>Blautia</i>                      | Positive | L-Glutamate                               | 0.7576  | 0.0111 |
| <i>Blautia producta</i>             | Positive | Acetylcholine                             | 0.7576  | 0.0111 |
| <i>Prevotella copri</i>             | Negative | Acetylcholine                             | -0.7576 | 0.0111 |
| <i>Prevotella copri</i>             | Negative | 4-Aminobutyric acid                       | -0.7576 | 0.0111 |
| <i>Lactobacillus helveticus</i>     | Negative | N-Acetylcadaverine                        | -0.7576 | 0.0111 |
| <i>Eubacterium bifforme</i>         | Negative | 3-Phospho-D-glycerate                     | -0.7576 | 0.0111 |
| <i>Blautia producta</i>             | Negative | 3-Phospho-D-glycerate                     | -0.7576 | 0.0111 |
| <i>Faecalibacterium prausnitzii</i> | Negative | 3-Phospho-D-glycerate                     | -0.7576 | 0.0111 |
| <i>Faecalibacterium</i>             | Negative | 3-Phospho-D-glycerate                     | -0.7576 | 0.0111 |
| <i>Blautia producta</i>             | Negative | Phosphoenolpyruvate                       | -0.7576 | 0.0111 |
| <i>Lactobacillus</i>                | Positive | 4-Hydroxybutanoic acid lactone            | 0.7576  | 0.0111 |
| <i>Ruminococcus torques</i>         | Positive | Adenine                                   | 0.7576  | 0.0111 |
| <i>Lactobacillus</i>                | Positive | Nicotinamide                              | 0.7576  | 0.0111 |
| <i>Lactobacillus</i>                | Positive | L-Histidine                               | 0.7576  | 0.0111 |
| <i>Prevotella copri</i>             | Negative | L-Citrulline                              | -0.7455 | 0.0133 |
| Other(<0.0005)                      | Positive | 3.alpha.-Mannobiose                       | 0.7455  | 0.0133 |
| <i>Eubacterium</i>                  | Positive | Glutaraldehyde                            | 0.7455  | 0.0133 |
| <i>Bacteroides</i>                  | Negative | Thr-Glu                                   | -0.7455 | 0.0133 |
| <i>Faecalibacterium prausnitzii</i> | Positive | gamma-L-Glutamyl-L-glutamic acid          | 0.7455  | 0.0133 |
| <i>Faecalibacterium</i>             | Positive | gamma-L-Glutamyl-L-glutamic acid          | 0.7455  | 0.0133 |
| <i>Lactobacillus</i>                | Positive | L-Pipecolic acid                          | 0.7455  | 0.0133 |
| <i>Gemmiger</i>                     | Positive | L-Glutamate                               | 0.7455  | 0.0133 |
| <i>Eubacterium</i>                  | Positive | L-Glutamate                               | 0.7455  | 0.0133 |

|                                     |          |                                           |         |        |
|-------------------------------------|----------|-------------------------------------------|---------|--------|
| <i>Gemmiger</i>                     | Negative | N-Acetylcadaverine                        | -0.7455 | 0.0133 |
| <i>Bacteroides</i>                  | Positive | N-Acetylcadaverine                        | 0.7455  | 0.0133 |
| <i>Gemmiger</i>                     | Negative | 2'-Deoxyadenosine 5'-monophosphate (dAMP) | -0.7455 | 0.0133 |
| <i>Blautia producta</i>             | Positive | Glycerophosphocholine                     | 0.7455  | 0.0133 |
| <i>Slackia</i>                      | Positive | Glycerophosphocholine                     | 0.7455  | 0.0133 |
| Other(<0.0005)                      | Negative | Acetylcarnitine                           | -0.7455 | 0.0133 |
| <i>Clostridium spiroforme</i>       | Positive | L-Proline                                 | 0.7416  | 0.0141 |
| <i>Bulleidia p-1630-c5</i>          | Positive | L-Citrulline                              | 0.7333  | 0.0158 |
| <i>Faecalibacterium prausnitzii</i> | Positive | L-Citrulline                              | 0.7333  | 0.0158 |
| <i>Faecalibacterium</i>             | Positive | L-Citrulline                              | 0.7333  | 0.0158 |
| <i>Lactobacillus</i>                | Positive | Cyclohexylamine                           | 0.7333  | 0.0158 |
| <i>Blautia producta</i>             | Positive | Choline                                   | 0.7333  | 0.0158 |
| <i>Lactobacillus</i>                | Positive | Choline                                   | 0.7333  | 0.0158 |
| <i>Lactobacillus</i>                | Positive | Ala-Asp                                   | 0.7333  | 0.0158 |
| <i>Coprococcus</i>                  | Negative | Diaminopimelic acid                       | -0.7333 | 0.0158 |
| <i>Blautia producta</i>             | Positive | D-Glucose 6-phosphate                     | 0.7333  | 0.0158 |
| <i>Allobaculum</i>                  | Positive | Diacetyl                                  | 0.7333  | 0.0158 |
| <i>Collinsella stercoris</i>        | Negative | N-Acetylcadaverine                        | -0.7333 | 0.0158 |
| <i>Faecalibacterium prausnitzii</i> | Negative | N-Acetylcadaverine                        | -0.7333 | 0.0158 |
| <i>Eubacterium</i>                  | Negative | N-Acetylcadaverine                        | -0.7333 | 0.0158 |
| <i>Blautia</i>                      | Negative | N-Acetylcadaverine                        | -0.7333 | 0.0158 |
| <i>Faecalibacterium</i>             | Negative | N-Acetylcadaverine                        | -0.7333 | 0.0158 |
| <i>Eubacterium</i>                  | Negative | Phosphoenolpyruvate                       | -0.7333 | 0.0158 |
| Other(<0.0005)                      | Negative | trans-2-Hydroxycinnamic acid              | -0.7333 | 0.0158 |
| <i>Gemmiger formicilis</i>          | Negative | 2'-Deoxyadenosine 5'-monophosphate (dAMP) | -0.7333 | 0.0158 |
| <i>Slackia</i>                      | Negative | 2'-Deoxyadenosine 5'-monophosphate (dAMP) | -0.7333 | 0.0158 |
| <i>Lactobacillus</i>                | Positive | S-Methyl-5'-thioadenosine                 | 0.7333  | 0.0158 |
| <i>Lactobacillus</i>                | Positive | Glycerophosphocholine                     | 0.7333  | 0.0158 |
| <i>Lactobacillus</i>                | Positive | L-Proline                                 | 0.7333  | 0.0158 |
| <i>Clostridium spiroforme</i>       | Positive | S-Adenosylmethionine                      | 0.7234  | 0.0180 |
| <i>Blautia</i>                      | Positive | L-Citrulline                              | 0.7212  | 0.0186 |
| <i>Lactobacillus</i>                | Positive | L-Citrulline                              | 0.7212  | 0.0186 |
| <i>Blautia producta</i>             | Positive | Glutaraldehyde                            | 0.7212  | 0.0186 |
| <i>Slackia</i>                      | Positive | Glutaraldehyde                            | 0.7212  | 0.0186 |
| <i>Lactobacillus</i>                | Positive | Ile-Glu                                   | 0.7212  | 0.0186 |
| <i>Coprococcus</i>                  | Negative | D-Fructose 1,6-bisphosphate               | -0.7212 | 0.0186 |
| <i>Faecalibacterium prausnitzii</i> | Positive | Uridine 5'-diphosphate (UDP)              | 0.7212  | 0.0186 |
| <i>Faecalibacterium</i>             | Positive | Uridine 5'-diphosphate (UDP)              | 0.7212  | 0.0186 |
| <i>Lactobacillus</i>                | Positive | Uridine 5'-diphosphate (UDP)              | 0.7212  | 0.0186 |
| <i>Faecalibacterium prausnitzii</i> | Negative | Deoxyadenosine                            | -0.7212 | 0.0186 |
| <i>Faecalibacterium</i>             | Negative | Deoxyadenosine                            | -0.7212 | 0.0186 |
| <i>Adlercreutzia</i>                | Positive | gamma-L-Glutamyl-L-glutamic acid          | 0.7212  | 0.0186 |
| <i>Faecalibacterium prausnitzii</i> | Positive | Creatine                                  | 0.7212  | 0.0186 |
| <i>Faecalibacterium</i>             | Positive | Creatine                                  | 0.7212  | 0.0186 |

|                                     |          |                                           |         |        |
|-------------------------------------|----------|-------------------------------------------|---------|--------|
| <i>Gemmiger formicilis</i>          | Positive | L-Glutamate                               | 0.7212  | 0.0186 |
| <i>Faecalibacterium prausnitzii</i> | Positive | L-Glutamate                               | 0.7212  | 0.0186 |
| <i>Faecalibacterium</i>             | Positive | L-Glutamate                               | 0.7212  | 0.0186 |
| <i>Lactobacillus</i>                | Positive | N6,N6,N6-Trimethyl-L-lysine               | 0.7212  | 0.0186 |
| <i>Turicibacter</i>                 | Positive | D-Glucose 6-phosphate                     | 0.7212  | 0.0186 |
| <i>Blautia producta</i>             | Positive | Diacetyl                                  | 0.7212  | 0.0186 |
| <i>Blautia</i>                      | Positive | Diacetyl                                  | 0.7212  | 0.0186 |
| <i>Coprococcus</i>                  | Negative | N-Acetylcadaverine                        | -0.7212 | 0.0186 |
| <i>Enterococcus</i>                 | Negative | 3-Phospho-D-glycerate                     | -0.7212 | 0.0186 |
| <i>Adlercreutzia</i>                | Negative | 3-Phospho-D-glycerate                     | -0.7212 | 0.0186 |
| <i>Eubacterium bifforme</i>         | Positive | Glycerophosphocholine                     | 0.7212  | 0.0186 |
| <i>Bacteroides</i>                  | Positive | 2-Hydroxyadenine                          | 0.7212  | 0.0186 |
| <i>Anaerobiospirillum</i>           | Negative | Betaine                                   | -0.7212 | 0.0186 |
| <i>Clostridium spiroforme</i>       | Positive | Phosphorylcholine                         | 0.7173  | 0.0195 |
| <i>Clostridium spiroforme</i>       | Positive | 3-Aminobutanoic acid                      | 0.7112  | 0.0211 |
| <i>Gemmiger formicilis</i>          | Positive | L-Citrulline                              | 0.7091  | 0.0217 |
| <i>Slackia</i>                      | Positive | L-Citrulline                              | 0.7091  | 0.0217 |
| <i>Bulleidia</i>                    | Positive | L-Citrulline                              | 0.7091  | 0.0217 |
| <i>Lactobacillus</i>                | Positive | P-Fluorophenylalanine                     | 0.7091  | 0.0217 |
| <i>Bacteroides</i>                  | Negative | Glycerol 3-phosphate                      | -0.7091 | 0.0217 |
| <i>Lactobacillus</i>                | Positive | Glycerol 3-phosphate                      | 0.7091  | 0.0217 |
| <i>Coprococcus</i>                  | Positive | Glutaraldehyde                            | 0.7091  | 0.0217 |
| <i>Bacteroides</i>                  | Negative | Glutaraldehyde                            | -0.7091 | 0.0217 |
| <i>Allobaculum</i>                  | Positive | Glutaraldehyde                            | 0.7091  | 0.0217 |
| <i>Bacteroides plebeius</i>         | Negative | Guanosine 5'-diphosphate (GDP)            | -0.7091 | 0.0217 |
| <i>Lactobacillus</i>                | Positive | Ala-Glu                                   | 0.7091  | 0.0217 |
| <i>Bulleidia p-1630-c5</i>          | Positive | Uridine 5'-diphosphate (UDP)              | 0.7091  | 0.0217 |
| <i>Lactobacillus</i>                | Positive | alpha-D-Glucose 1-phosphate               | 0.7091  | 0.0217 |
| <i>Coprococcus</i>                  | Negative | Deoxyadenosine                            | -0.7091 | 0.0217 |
| <i>Blautia producta</i>             | Positive | Creatine                                  | 0.7091  | 0.0217 |
| <i>Ruminococcus</i>                 | Positive | Creatine                                  | 0.7091  | 0.0217 |
| <i>Lactobacillus</i>                | Positive | Creatine                                  | 0.7091  | 0.0217 |
| <i>Gemmiger</i>                     | Negative | Diaminopimelic acid                       | -0.7091 | 0.0217 |
| <i>Blautia</i>                      | Positive | Acetylcholine                             | 0.7091  | 0.0217 |
| <i>Lactobacillus</i>                | Positive | 4-Aminobutyric acid                       | 0.7091  | 0.0217 |
| <i>Slackia</i>                      | Negative | N-Acetylcadaverine                        | -0.7091 | 0.0217 |
| <i>Adlercreutzia</i>                | Negative | N-Acetylcadaverine                        | -0.7091 | 0.0217 |
| <i>Gemmiger formicilis</i>          | Negative | 3-Phospho-D-glycerate                     | -0.7091 | 0.0217 |
| <i>Lactobacillus</i>                | Positive | D-Pipecolic acid                          | 0.7091  | 0.0217 |
| <i>Eubacterium bifforme</i>         | Negative | Phosphoenolpyruvate                       | -0.7091 | 0.0217 |
| <i>Enterococcus</i>                 | Negative | Phosphoenolpyruvate                       | -0.7091 | 0.0217 |
| <i>Bacteroides plebeius</i>         | Positive | 2'-Deoxyadenosine 5'-monophosphate (dAMP) | 0.7091  | 0.0217 |
| <i>Bulleidia p-1630-c5</i>          | Negative | 2'-Deoxyadenosine 5'-monophosphate (dAMP) | -0.7091 | 0.0217 |
| <i>Allobaculum</i>                  | Positive | Adenine                                   | 0.7091  | 0.0217 |

|                                     |          |                                  |         |        |
|-------------------------------------|----------|----------------------------------|---------|--------|
| <i>Blautia producta</i>             | Positive | Cytosine                         | 0.7091  | 0.0217 |
| <i>Faecalibacterium prausnitzii</i> | Negative | Daidzein                         | -0.7091 | 0.0217 |
| <i>Faecalibacterium</i>             | Negative | Daidzein                         | -0.7091 | 0.0217 |
| <i>Adlercreutzia</i>                | Positive | Glycerophosphocholine            | 0.7091  | 0.0217 |
| <i>Faecalibacterium prausnitzii</i> | Positive | Betaine                          | 0.7091  | 0.0217 |
| <i>Megamonas</i>                    | Positive | Betaine                          | 0.7091  | 0.0217 |
| <i>Faecalibacterium</i>             | Positive | Betaine                          | 0.7091  | 0.0217 |
| <i>Clostridium spiroforme</i>       | Positive | N6,N6,N6-Trimethyl-L-lysine      | 0.6991  | 0.0245 |
| <i>Bacteroides plebeius</i>         | Negative | L-Citrulline                     | -0.6970 | 0.0251 |
| <i>Collinsella</i>                  | Positive | Choline                          | 0.6970  | 0.0251 |
| <i>Lactobacillus helveticus</i>     | Positive | Glutaraldehyde                   | 0.6970  | 0.0251 |
| <i>Lactobacillus</i>                | Negative | Isomaltose                       | -0.6970 | 0.0251 |
| <i>Cetobacterium</i>                | Negative | D-Fructose 1,6-bisphosphate      | -0.6970 | 0.0251 |
| <i>Lactobacillus</i>                | Positive | Thr-Glu                          | 0.6970  | 0.0251 |
| <i>Ruminococcus torques</i>         | Positive | Uridine 5'-diphosphate (UDP)     | 0.6970  | 0.0251 |
| <i>Bulleidia</i>                    | Positive | Uridine 5'-diphosphate (UDP)     | 0.6970  | 0.0251 |
| <i>Bulleidia p-1630-c5</i>          | Positive | Creatine                         | 0.6970  | 0.0251 |
| <i>Prevotella copri</i>             | Negative | Creatine                         | -0.6970 | 0.0251 |
| <i>Enterococcus</i>                 | Positive | D-Alanyl-D-alanine (D-Ala-D-Ala) | 0.6970  | 0.0251 |
| <i>Bulleidia p-1630-c5</i>          | Positive | L-Glutamate                      | 0.6970  | 0.0251 |
| <i>Slackia</i>                      | Positive | L-Glutamate                      | 0.6970  | 0.0251 |
| <i>Slackia</i>                      | Negative | Diaminopimelic acid              | -0.6970 | 0.0251 |
| <i>Adlercreutzia</i>                | Positive | N6,N6,N6-Trimethyl-L-lysine      | 0.6970  | 0.0251 |
| <i>Adlercreutzia</i>                | Positive | Acetylcholine                    | 0.6970  | 0.0251 |
| <i>Dialister</i>                    | Positive | D-Glucose 6-phosphate            | 0.6970  | 0.0251 |
| <i>Adlercreutzia</i>                | Positive | D-Glucose 6-phosphate            | 0.6970  | 0.0251 |
| <i>Bacteroides</i>                  | Negative | D-Glucose 6-phosphate            | -0.6970 | 0.0251 |
| <i>Blautia</i>                      | Positive | D-Glucose 6-phosphate            | 0.6970  | 0.0251 |
| <i>Bacteroides plebeius</i>         | Negative | Diacetyl                         | -0.6970 | 0.0251 |
| <i>Ruminococcus</i>                 | Positive | Diacetyl                         | 0.6970  | 0.0251 |
| <i>Bacteroides plebeius</i>         | Positive | N-Acetylcadaverine               | 0.6970  | 0.0251 |
| <i>Collinsella</i>                  | Negative | N-Acetylcadaverine               | -0.6970 | 0.0251 |
| <i>Allobaculum</i>                  | Negative | N-Acetylcadaverine               | -0.6970 | 0.0251 |
| <i>Gemmiger</i>                     | Negative | 3-Phospho-D-glycerate            | -0.6970 | 0.0251 |
| <i>Bifidobacterium adolescentis</i> | Positive | 4-Hydroxybutanoic acid lactone   | 0.6970  | 0.0251 |
| <i>Coprococcus</i>                  | Negative | L-Carnosine                      | -0.6970 | 0.0251 |
| <i>Adlercreutzia</i>                | Positive | Nicotinamide                     | 0.6970  | 0.0251 |
| <i>Eubacterium bifforme</i>         | Positive | L-Citrulline                     | 0.6848  | 0.0289 |
| <i>Gemmiger</i>                     | Positive | L-Citrulline                     | 0.6848  | 0.0289 |
| <i>Adlercreutzia</i>                | Positive | L-Citrulline                     | 0.6848  | 0.0289 |
| <i>Ruminococcus</i>                 | Positive | L-Citrulline                     | 0.6848  | 0.0289 |
| <i>Bacteroides plebeius</i>         | Negative | Glycerol 3-phosphate             | -0.6848 | 0.0289 |
| <i>Lactobacillus</i>                | Positive | Phosphorylcholine                | 0.6848  | 0.0289 |
| <i>Butyricoccus pullicaecorum</i>   | Positive | Glutaraldehyde                   | 0.6848  | 0.0289 |

|                                     |          |                                           |         |        |
|-------------------------------------|----------|-------------------------------------------|---------|--------|
| <i>Lactobacillus</i>                | Positive | DL-Indole-3-lactic acid                   | 0.6848  | 0.0289 |
| <i>Bulleidia</i>                    | Positive | Creatine                                  | 0.6848  | 0.0289 |
| <i>Eubacterium bifforme</i>         | Positive | L-Glutamate                               | 0.6848  | 0.0289 |
| <i>Bacteroides</i>                  | Negative | L-Glutamate                               | -0.6848 | 0.0289 |
| <i>Bulleidia p-1630-c5</i>          | Positive | Diacetyl                                  | 0.6848  | 0.0289 |
| <i>Bifidobacterium adolescentis</i> | Negative | 3-Phospho-D-glycerate                     | -0.6848 | 0.0289 |
| <i>Collinsella stercoris</i>        | Negative | 3-Phospho-D-glycerate                     | -0.6848 | 0.0289 |
| <i>Lactobacillus</i>                | Positive | (3-Carboxypropyl)trimethylammonium cation | 0.6848  | 0.0289 |
| <i>Gemmiger formicilis</i>          | Negative | Phosphoenolpyruvate                       | -0.6848 | 0.0289 |
| <i>Adlercreutzia</i>                | Negative | Phosphoenolpyruvate                       | -0.6848 | 0.0289 |
| Other(<0.0005)                      | Negative | Dopamine                                  | -0.6848 | 0.0289 |
| <i>Faecalibacterium prausnitzii</i> | Negative | 2'-Deoxyadenosine 5'-monophosphate (dAMP) | -0.6848 | 0.0289 |
| <i>Bacteroides</i>                  | Positive | 2'-Deoxyadenosine 5'-monophosphate (dAMP) | 0.6848  | 0.0289 |
| <i>Faecalibacterium</i>             | Negative | 2'-Deoxyadenosine 5'-monophosphate (dAMP) | -0.6848 | 0.0289 |
| <i>Escherichia</i>                  | Negative | L-Carnosine                               | -0.6848 | 0.0289 |
| <i>Blautia producta</i>             | Positive | Adenine                                   | 0.6848  | 0.0289 |
| <i>Blautia</i>                      | Positive | Adenine                                   | 0.6848  | 0.0289 |
| <i>Lactobacillus</i>                | Positive | Adenine                                   | 0.6848  | 0.0289 |
| <i>Bacteroides plebeius</i>         | Negative | Glycerophosphocholine                     | -0.6848 | 0.0289 |
| <i>Lactobacillus helveticus</i>     | Positive | Glycerophosphocholine                     | 0.6848  | 0.0289 |
| <i>Blautia</i>                      | Positive | Glycerophosphocholine                     | 0.6848  | 0.0289 |
| <i>Clostridium spiroforme</i>       | Negative | Flavin adenine dinucleotide (FAD)         | -0.6748 | 0.0323 |
| <i>Eubacterium</i>                  | Positive | L-Citrulline                              | 0.6727  | 0.0330 |
| <i>Blautia</i>                      | Positive | Choline                                   | 0.6727  | 0.0330 |
| <i>Lactobacillus</i>                | Positive | Ser-Asp                                   | 0.6727  | 0.0330 |
| <i>Bacteroides</i>                  | Positive | D-Fructose 1,6-bisphosphate               | 0.6727  | 0.0330 |
| <i>Prevotella copri</i>             | Negative | Uridine 5'-diphosphate (UDP)              | -0.6727 | 0.0330 |
| <i>Adlercreutzia</i>                | Positive | Uridine 5'-diphosphate (UDP)              | 0.6727  | 0.0330 |
| <i>Adlercreutzia</i>                | Negative | Deoxyadenosine                            | -0.6727 | 0.0330 |
| <i>Bacteroides plebeius</i>         | Negative | Creatine                                  | -0.6727 | 0.0330 |
| <i>Lactobacillus</i>                | Positive | Uridine 5'-monophosphate (UMP)            | 0.6727  | 0.0330 |
| <i>Adlercreutzia</i>                | Positive | L-Pipecolic acid                          | 0.6727  | 0.0330 |
| <i>Bacteroides plebeius</i>         | Negative | L-Glutamate                               | -0.6727 | 0.0330 |
| <i>Dialister</i>                    | Positive | L-Glutamate                               | 0.6727  | 0.0330 |
| <i>Bacteroides plebeius</i>         | Negative | D-Glucose 6-phosphate                     | -0.6727 | 0.0330 |
| <i>Ruminococcus torques</i>         | Positive | 4-Aminobutyric acid                       | 0.6727  | 0.0330 |
| <i>Bulleidia</i>                    | Positive | Diacetyl                                  | 0.6727  | 0.0330 |
| <i>Eubacterium</i>                  | Positive | Diacetyl                                  | 0.6727  | 0.0330 |
| <i>Adlercreutzia</i>                | Positive | Diacetyl                                  | 0.6727  | 0.0330 |
| <i>Dialister</i>                    | Negative | N-Acetylcadaverine                        | -0.6727 | 0.0330 |
| <i>Bacteroides plebeius</i>         | Negative | N6-Acetyl-L-lysine                        | -0.6727 | 0.0330 |
| <i>Cetobacterium</i>                | Positive | N-Acetyl-L-Histidine                      | 0.6727  | 0.0330 |
| <i>Slackia</i>                      | Positive | D-Pipecolic acid                          | 0.6727  | 0.0330 |
| <i>Gemmiger</i>                     | Negative | Phosphoenolpyruvate                       | -0.6727 | 0.0330 |

|                                     |          |                                           |         |        |
|-------------------------------------|----------|-------------------------------------------|---------|--------|
| <i>Blautia</i>                      | Negative | Phosphoenolpyruvate                       | -0.6727 | 0.0330 |
| <i>Collinsella</i>                  | Negative | Phosphoenolpyruvate                       | -0.6727 | 0.0330 |
| Other(<0.0005)                      | Negative | L-Tyrosine                                | -0.6727 | 0.0330 |
| <i>Veillonella</i>                  | Positive | trans-2-Hydroxycinnamic acid              | 0.6727  | 0.0330 |
| <i>Bulleidia</i>                    | Negative | 2'-Deoxyadenosine 5'-monophosphate (dAMP) | -0.6727 | 0.0330 |
| <i>Dialister</i>                    | Negative | 2'-Deoxyadenosine 5'-monophosphate (dAMP) | -0.6727 | 0.0330 |
| <i>Adlercreutzia</i>                | Negative | 2'-Deoxyadenosine 5'-monophosphate (dAMP) | -0.6727 | 0.0330 |
| <i>Butyricoccus</i>                 | Negative | 2'-Deoxyadenosine 5'-monophosphate (dAMP) | -0.6727 | 0.0330 |
| <i>Collinsella</i>                  | Negative | 2'-Deoxyadenosine 5'-monophosphate (dAMP) | -0.6727 | 0.0330 |
| <i>Adlercreutzia</i>                | Positive | Cytosine                                  | 0.6727  | 0.0330 |
| <i>Allobaculum</i>                  | Negative | Daidzein                                  | -0.6727 | 0.0330 |
| <i>Gemmiger formicilis</i>          | Positive | Glycerophosphocholine                     | 0.6727  | 0.0330 |
| <i>Prevotella copri</i>             | Negative | Glycerophosphocholine                     | -0.6727 | 0.0330 |
| <i>Eubacterium</i>                  | Positive | Glycerophosphocholine                     | 0.6727  | 0.0330 |
| <i>Lactobacillus</i>                | Positive | L-Arginine                                | 0.6727  | 0.0330 |
| <i>Lactobacillus</i>                | Positive | gamma-L- Glutamyl-L-phenylalanine         | 0.6606  | 0.0376 |
| <i>Ruminococcus torques</i>         | Positive | Choline                                   | 0.6606  | 0.0376 |
| <i>Ruminococcus</i>                 | Positive | Uridine 5'-diphosphate (UDP)              | 0.6606  | 0.0376 |
| <i>Bacteroides</i>                  | Negative | Dihydroxyfumarate                         | -0.6606 | 0.0376 |
| <i>Blautia</i>                      | Positive | Creatine                                  | 0.6606  | 0.0376 |
| <i>Prevotella copri</i>             | Negative | L-Pipecolic acid                          | -0.6606 | 0.0376 |
| <i>Bulleidia</i>                    | Positive | L-Glutamate                               | 0.6606  | 0.0376 |
| <i>Collinsella</i>                  | Positive | L-Glutamate                               | 0.6606  | 0.0376 |
| <i>Lactobacillus</i>                | Positive | ADP-ribose                                | 0.6606  | 0.0376 |
| <i>Gemmiger formicilis</i>          | Negative | Diaminopimelic acid                       | -0.6606 | 0.0376 |
| <i>Eubacterium</i>                  | Negative | Diaminopimelic acid                       | -0.6606 | 0.0376 |
| <i>Bulleidia</i>                    | Positive | Acetylcholine                             | 0.6606  | 0.0376 |
| <i>Bacteroides</i>                  | Negative | Acetylcholine                             | -0.6606 | 0.0376 |
| <i>Allobaculum</i>                  | Positive | Acetylcholine                             | 0.6606  | 0.0376 |
| <i>Prevotella copri</i>             | Negative | D-Glucose 6-phosphate                     | -0.6606 | 0.0376 |
| <i>Allobaculum</i>                  | Positive | D-Glucose 6-phosphate                     | 0.6606  | 0.0376 |
| <i>Blautia</i>                      | Positive | 4-Aminobutyric acid                       | 0.6606  | 0.0376 |
| <i>Allobaculum</i>                  | Positive | 4-Aminobutyric acid                       | 0.6606  | 0.0376 |
| Other(<0.0005)                      | Positive | Stearidonic Acid                          | 0.6606  | 0.0376 |
| <i>Ruminococcus torques</i>         | Positive | N6-Acetyl-L-lysine                        | 0.6606  | 0.0376 |
| <i>Lactobacillus</i>                | Positive | N6-Acetyl-L-lysine                        | 0.6606  | 0.0376 |
| <i>Slackia</i>                      | Negative | 3-Phospho-D-glycerate                     | -0.6606 | 0.0376 |
| <i>Blautia</i>                      | Negative | 3-Phospho-D-glycerate                     | -0.6606 | 0.0376 |
| <i>Prevotella copri</i>             | Negative | N-Acetyl-L-Histidine                      | -0.6606 | 0.0376 |
| <i>Faecalibacterium prausnitzii</i> | Positive | D-Pipecolic acid                          | 0.6606  | 0.0376 |
| <i>Faecalibacterium</i>             | Positive | D-Pipecolic acid                          | 0.6606  | 0.0376 |
| <i>Collinsella stercoris</i>        | Negative | Phosphoenolpyruvate                       | -0.6606 | 0.0376 |
| <i>Allobaculum</i>                  | Negative | Phosphoenolpyruvate                       | -0.6606 | 0.0376 |
| <i>Bifidobacterium adolescentis</i> | Positive | L-Tyrosine                                | 0.6606  | 0.0376 |



|                                     |          |                                |         |        |
|-------------------------------------|----------|--------------------------------|---------|--------|
| <i>Lactobacillus</i>                | Positive | Ser-Glu                        | 0.6606  | 0.0376 |
| <i>Lactobacillus</i>                | Positive | L-Phenylalanine                | 0.6606  | 0.0376 |
| <i>Faecalibacterium prausnitzii</i> | Negative | L-Carnosine                    | -0.6606 | 0.0376 |
| <i>Faecalibacterium</i>             | Negative | L-Carnosine                    | -0.6606 | 0.0376 |
| <i>Dialister</i>                    | Positive | Adenine                        | 0.6606  | 0.0376 |
| <i>Ruminococcus</i>                 | Positive | Adenine                        | 0.6606  | 0.0376 |
| <i>Lactobacillus</i>                | Positive | Triethanolamine                | 0.6606  | 0.0376 |
| <i>Ruminococcus torques</i>         | Positive | Glycerophosphocholine          | 0.6606  | 0.0376 |
| <i>Gemmiger</i>                     | Positive | Glycerophosphocholine          | 0.6606  | 0.0376 |
| <i>Veillonella</i>                  | Positive | Acetylcarnitine                | 0.6606  | 0.0376 |
| <i>Coprococcus</i>                  | Negative | 2-Hydroxyadenine               | -0.6606 | 0.0376 |
| <i>Cetobacterium</i>                | Negative | 2-Hydroxyadenine               | -0.6606 | 0.0376 |
| <i>Clostridium spiroforme</i>       | Positive | Acetylcarnitine                | 0.6565  | 0.0392 |
| <i>Catenibacterium</i>              | Negative | 2-Hydroxyadenine               | -0.6565 | 0.0392 |
| <i>Clostridium spiroforme</i>       | Negative | 3.alpha.-Mannobiose            | -0.6505 | 0.0417 |
| <i>Bacteroides coprophilus</i>      | Negative | Betaine                        | -0.6505 | 0.0417 |
| <i>Collinsella</i>                  | Positive | L-Citrulline                   | 0.6485  | 0.0425 |
| <i>Allobaculum</i>                  | Positive | L-Citrulline                   | 0.6485  | 0.0425 |
| <i>Blautia producta</i>             | Positive | P-Fluorophenylalanine          | 0.6485  | 0.0425 |
| <i>Collinsella stercoris</i>        | Positive | Choline                        | 0.6485  | 0.0425 |
| <i>Slackia</i>                      | Positive | Choline                        | 0.6485  | 0.0425 |
| <i>Butyricicoccus</i>               | Positive | Glutaraldehyde                 | 0.6485  | 0.0425 |
| <i>Blautia</i>                      | Positive | Glutaraldehyde                 | 0.6485  | 0.0425 |
| <i>Bacteroides</i>                  | Negative | Guanosine 5'-diphosphate (GDP) | -0.6485 | 0.0425 |
| <i>Gemmiger</i>                     | Negative | D-Fructose 1,6-bisphosphate    | -0.6485 | 0.0425 |
| <i>Bacteroides</i>                  | Negative | L-Carnitine                    | -0.6485 | 0.0425 |
| <i>Bacteroides</i>                  | Negative | Ala-Glu                        | -0.6485 | 0.0425 |
| <i>Faecalibacterium prausnitzii</i> | Positive | L-Tryptophan                   | 0.6485  | 0.0425 |
| <i>Faecalibacterium</i>             | Positive | L-Tryptophan                   | 0.6485  | 0.0425 |
| <i>Anaerobiospirillum</i>           | Negative | Ile-Asp                        | -0.6485 | 0.0425 |
| <i>Coprococcus</i>                  | Positive | L-Glutamate                    | 0.6485  | 0.0425 |
| <i>Bulleidia p-1630-c5</i>          | Positive | Acetylcholine                  | 0.6485  | 0.0425 |
| <i>Eubacterium bifforme</i>         | Positive | Acetylcholine                  | 0.6485  | 0.0425 |
| <i>Ruminococcus</i>                 | Positive | Acetylcholine                  | 0.6485  | 0.0425 |
| <i>Eubacterium bifforme</i>         | Positive | D-Glucose 6-phosphate          | 0.6485  | 0.0425 |
| <i>Faecalibacterium prausnitzii</i> | Positive | D-Glucose 6-phosphate          | 0.6485  | 0.0425 |
| <i>Eubacterium</i>                  | Positive | D-Glucose 6-phosphate          | 0.6485  | 0.0425 |
| <i>Faecalibacterium</i>             | Positive | D-Glucose 6-phosphate          | 0.6485  | 0.0425 |
| <i>Blautia producta</i>             | Positive | 4-Aminobutyric acid            | 0.6485  | 0.0425 |
| <i>Slackia</i>                      | Positive | 4-Aminobutyric acid            | 0.6485  | 0.0425 |
| <i>Adlercreutzia</i>                | Positive | 4-Aminobutyric acid            | 0.6485  | 0.0425 |
| <i>Ruminococcus torques</i>         | Negative | N-Acetylcadaverine             | -0.6485 | 0.0425 |
| <i>Coprococcus</i>                  | Negative | 3-Phospho-D-glycerate          | -0.6485 | 0.0425 |
| <i>Collinsella</i>                  | Negative | 3-Phospho-D-glycerate          | -0.6485 | 0.0425 |

|                                     |          |                                           |         |        |
|-------------------------------------|----------|-------------------------------------------|---------|--------|
| <i>Allobaculum</i>                  | Negative | 3-Phospho-D-glycerate                     | -0.6485 | 0.0425 |
| <i>Lactobacillus</i>                | Positive | N-Acetyl-L-Histidine                      | 0.6485  | 0.0425 |
| <i>Gemmiger</i>                     | Positive | D-Pipecolinic acid                        | 0.6485  | 0.0425 |
| <i>Veillonella</i>                  | Positive | L-Tyrosine                                | 0.6485  | 0.0425 |
| <i>Butyricoccus pulliaecorum</i>    | Negative | 2'-Deoxyadenosine 5'-monophosphate (dAMP) | -0.6485 | 0.0425 |
| <i>Coprococcus</i>                  | Negative | 2'-Deoxyadenosine 5'-monophosphate (dAMP) | -0.6485 | 0.0425 |
| <i>Gemmiger</i>                     | Negative | L-Carnosine                               | -0.6485 | 0.0425 |
| <i>Bulleidia p-1630-c5</i>          | Positive | Adenine                                   | 0.6485  | 0.0425 |
| <i>Lactobacillus</i>                | Positive | L-Fucose-1-phosphate                      | 0.6485  | 0.0425 |
| <i>Anaerobiospirillum</i>           | Negative | Cytosine                                  | -0.6485 | 0.0425 |
| <i>Collinsella</i>                  | Positive | Cytosine                                  | 0.6485  | 0.0425 |
| <i>Lactobacillus</i>                | Positive | Cytidine 5'-monophosphate (CMP)           | 0.6485  | 0.0425 |
| <i>Turicibacter</i>                 | Positive | Glycerophosphocholine                     | 0.6485  | 0.0425 |
| <i>Bacteroides</i>                  | Negative | Glycerophosphocholine                     | -0.6485 | 0.0425 |
| <i>Bifidobacterium adolescentis</i> | Positive | Acetylcarnitine                           | 0.6485  | 0.0425 |
| <i>Prevotella copri</i>             | Positive | 2-Hydroxyadenine                          | 0.6485  | 0.0425 |
| <i>Dialister</i>                    | Negative | 2-Hydroxyadenine                          | -0.6485 | 0.0425 |
| <i>Clostridium</i>                  | Negative | 2-Hydroxyadenine                          | -0.6485 | 0.0425 |
| <i>Clostridium spiroforme</i>       | Positive | trans-2-Hydroxycinnamic acid              | 0.6444  | 0.0443 |
| <i>Faecalibacterium prausnitzii</i> | Positive | Cyclohexylamine                           | 0.6364  | 0.0479 |
| <i>Faecalibacterium</i>             | Positive | Cyclohexylamine                           | 0.6364  | 0.0479 |
| <i>Bacteroides plebeius</i>         | Negative | Glutaraldehyde                            | -0.6364 | 0.0479 |
| <i>Dialister</i>                    | Positive | Glutaraldehyde                            | 0.6364  | 0.0479 |
| <i>Lactobacillus</i>                | Positive | Guanosine 5'-diphosphate (GDP)            | 0.6364  | 0.0479 |
| <i>Gemmiger formicilis</i>          | Negative | D-Fructose 1,6-bisphosphate               | -0.6364 | 0.0479 |
| <i>Lactobacillus</i>                | Positive | L-Carnitine                               | 0.6364  | 0.0479 |
| <i>Bacteroides plebeius</i>         | Negative | Ala-Glu                                   | -0.6364 | 0.0479 |
| <i>Blautia producta</i>             | Positive | Uridine 5'-diphosphate (UDP)              | 0.6364  | 0.0479 |
| <i>Blautia producta</i>             | Positive | gamma-L-Glutamyl-L-glutamic acid          | 0.6364  | 0.0479 |
| <i>Bacteroides plebeius</i>         | Negative | Dihydroxyfumarate                         | -0.6364 | 0.0479 |
| <i>Slackia</i>                      | Positive | D-Glucose 6-phosphate                     | 0.6364  | 0.0479 |
| <i>Collinsella</i>                  | Positive | D-Glucose 6-phosphate                     | 0.6364  | 0.0479 |
| <i>Eubacterium</i>                  | Positive | 4-Aminobutyric acid                       | 0.6364  | 0.0479 |
| <i>Eubacterium bifforme</i>         | Positive | Diacetyl                                  | 0.6364  | 0.0479 |
| <i>Blautia producta</i>             | Positive | N6-Acetyl-L-lysine                        | 0.6364  | 0.0479 |
| <i>Adlercreutzia</i>                | Positive | D-Pipecolinic acid                        | 0.6364  | 0.0479 |
| <i>Adlercreutzia</i>                | Positive | Dopamine                                  | 0.6364  | 0.0479 |
| <i>Lactobacillus</i>                | Positive | N6-Methyl-L-lysine                        | 0.6364  | 0.0479 |
| <i>Collinsella stercoris</i>        | Negative | 2'-Deoxyadenosine 5'-monophosphate (dAMP) | -0.6364 | 0.0479 |
| <i>Bulleidia</i>                    | Positive | Adenine                                   | 0.6364  | 0.0479 |
| <i>Gemmiger</i>                     | Negative | Daidzein                                  | -0.6364 | 0.0479 |
| <i>Eubacterium</i>                  | Negative | Daidzein                                  | -0.6364 | 0.0479 |
| <i>Dialister</i>                    | Positive | Glycerophosphocholine                     | 0.6364  | 0.0479 |
| <i>Eubacterium bifforme</i>         | Positive | Nicotinamide                              | 0.6364  | 0.0479 |

|                                           |          |                  |         |        |
|-------------------------------------------|----------|------------------|---------|--------|
| <i>Turicibacter</i>                       | Positive | Nicotinamide     | 0.6364  | 0.0479 |
| <i>Prevotella</i>                         | Negative | Uracil           | -0.6364 | 0.0479 |
| <i>Ruminococcus torques</i>               | Negative | 2-Hydroxyadenine | -0.6364 | 0.0479 |
| <i>Bulleidia</i>                          | Negative | 2-Hydroxyadenine | -0.6364 | 0.0479 |
| Daidzein                                  | Negative | sIgA             | -0.9636 | 0.0000 |
| L-Glutamate                               | Positive | sIgA             | 0.9515  | 0.0000 |
| Phosphoenolpyruvate                       | Negative | sIgA             | -0.9273 | 0.0001 |
| 2'-Deoxyadenosine 5'-monophosphate (dAMP) | Negative | sIgA             | -0.9030 | 0.0003 |
| 1-Aminocyclopropanecarboxylic acid        | Negative | IL-6             | -0.8788 | 0.0008 |
| 3-Phospho-D-glycerate                     | Negative | sIgA             | -0.8788 | 0.0008 |
| Choline                                   | Positive | sIgA             | 0.8667  | 0.0012 |
| Glyceraldehyde 3-phosphate                | Negative | IL-6             | -0.8667 | 0.0012 |
| Creatine                                  | Positive | sIgA             | 0.8667  | 0.0012 |
| Ile-Asp                                   | Positive | sIgA             | 0.8667  | 0.0012 |
| His-Ile                                   | Negative | IL-6             | -0.8667 | 0.0012 |
| L-Citrulline                              | Positive | sIgA             | 0.8545  | 0.0016 |
| DL-Indole-3-lactic acid                   | Positive | sIgA             | 0.8424  | 0.0022 |
| Uridine 5'-diphosphate (UDP)              | Positive | sIgA             | 0.8424  | 0.0022 |
| L-Tryptophan                              | Negative | IL-6             | -0.8424 | 0.0022 |
| D-Alanyl-D-alanine (D-Ala-D-Ala)          | Positive | sIgA             | 0.8424  | 0.0022 |
| N-Acetylcadaverine                        | Negative | sIgA             | -0.8424 | 0.0022 |
| L-Carnosine                               | Negative | sIgA             | -0.8424 | 0.0022 |
| Dimethylaminopurine                       | Positive | IL-6             | 0.8424  | 0.0022 |
| Adenosine 5'-diphosphate (ADP)            | Negative | IL-6             | -0.8424 | 0.0022 |
| gamma-L-Glutamyl-L-glutamic acid          | Positive | sIgA             | 0.8303  | 0.0029 |
| 4-Aminobutyric acid                       | Positive | sIgA             | 0.8303  | 0.0029 |
| N6-Acetyl-L-lysine                        | Negative | IL-6             | -0.8303 | 0.0029 |
| D-Pipecolic acid                          | Positive | sIgA             | 0.8303  | 0.0029 |
| Cytosine                                  | Positive | sIgA             | 0.8303  | 0.0029 |
| Dihydroxyfumarate                         | Negative | IL-6             | -0.8182 | 0.0038 |
| Norharmane                                | Negative | IL-6             | -0.8182 | 0.0038 |
| D-Glucose 6-phosphate                     | Positive | sIgA             | 0.8182  | 0.0038 |
| Adenosine monophosphate (AMP)             | Positive | sIgA             | 0.8182  | 0.0038 |
| Adenine                                   | Positive | sIgA             | 0.8182  | 0.0038 |
| S-Methyl-5'-thioadenosine                 | Positive | sIgA             | 0.8182  | 0.0038 |
| His-Pro                                   | Negative | IL-6             | -0.8182 | 0.0038 |
| Phe-Gln                                   | Negative | IL-6             | -0.8182 | 0.0038 |
| P-Fluorophenylalanine                     | Positive | sIgA             | 0.8061  | 0.0049 |
| Glutaraldehyde                            | Positive | sIgA             | 0.8061  | 0.0049 |
| L-Tryptophan                              | Positive | sIgA             | 0.8061  | 0.0049 |
| Diacetyl                                  | Positive | sIgA             | 0.8061  | 0.0049 |
| N-Acetyl-L-Histidine                      | Positive | sIgA             | 0.8061  | 0.0049 |
| L-Fucose-1-phosphate                      | Positive | sIgA             | 0.8061  | 0.0049 |

|                                         |          |       |         |        |
|-----------------------------------------|----------|-------|---------|--------|
| 2'-O-methylcytidine                     | Negative | IL-6  | -0.7939 | 0.0061 |
| Creatine                                | Negative | IL-6  | -0.7939 | 0.0061 |
| Diaminopimelic acid                     | Negative | sIgA  | -0.7939 | 0.0061 |
| Dimethylaminopurine                     | Negative | sIgA  | -0.7939 | 0.0061 |
| L-Histidine                             | Positive | sIgA  | 0.7939  | 0.0061 |
| L-Carnitine                             | Positive | sIgA  | 0.7818  | 0.0075 |
| Deoxyadenosine                          | Negative | sIgA  | -0.7818 | 0.0075 |
| Nicotinamide adenine dinucleotide (NAD) | Negative | IL-6  | -0.7818 | 0.0075 |
| Arg-Glu                                 | Negative | IL-6  | -0.7818 | 0.0075 |
| Tyramine                                | Negative | IL-6  | -0.7818 | 0.0075 |
| Phe-Gln                                 | Positive | sIgA  | 0.7818  | 0.0075 |
| Adenosine 5'-diphosphate (ADP)          | Positive | sIgA  | 0.7818  | 0.0075 |
| L-Citrulline                            | Negative | IL-6  | -0.7697 | 0.0092 |
| L-Carnitine                             | Negative | IL-6  | -0.7697 | 0.0092 |
| Creatinine                              | Negative | IL-6  | -0.7697 | 0.0092 |
| gamma-L-Glutamyl-L-phenylalanine        | Negative | IL-6  | -0.7576 | 0.0111 |
| Choline                                 | Negative | IL-6  | -0.7576 | 0.0111 |
| Dihydroxyfumarate                       | Positive | sIgA  | 0.7576  | 0.0111 |
| N6-Acetyl-L-lysine                      | Positive | sIgA  | 0.7576  | 0.0111 |
| His-Pro                                 | Positive | sIgA  | 0.7576  | 0.0111 |
| Glycerophosphocholine                   | Positive | sIgA  | 0.7576  | 0.0111 |
| L-Arginine                              | Positive | sIgA  | 0.7576  | 0.0111 |
| Cyclohexylamine                         | Positive | sIgA  | 0.7455  | 0.0133 |
| alpha-D-Glucose 1-phosphate             | Positive | sIgA  | 0.7455  | 0.0133 |
| Ile-Asp                                 | Negative | IL-6  | -0.7455 | 0.0133 |
| Adenosine monophosphate (AMP)           | Negative | IL-6  | -0.7455 | 0.0133 |
| Betaine                                 | Negative | T-SOD | -0.7455 | 0.0133 |
| Isomaltose                              | Negative | sIgA  | -0.7333 | 0.0158 |
| Ile-Glu                                 | Positive | sIgA  | 0.7333  | 0.0158 |
| Acetylcholine                           | Positive | sIgA  | 0.7333  | 0.0158 |
| Stearidonic Acid                        | Negative | sIgA  | -0.7333 | 0.0158 |
| Adenine                                 | Negative | IL-6  | -0.7333 | 0.0158 |
| S-Methyl-5'-thioadenosine               | Negative | IL-6  | -0.7333 | 0.0158 |
| Nicotinamide                            | Positive | sIgA  | 0.7333  | 0.0158 |
| P-Fluorophenylalanine                   | Negative | IL-6  | -0.7212 | 0.0186 |
| D-Fructose 1,6-bisphosphate             | Negative | sIgA  | -0.7212 | 0.0186 |
| 1-Aminocyclopropanecarboxylic acid      | Positive | sIgA  | 0.7212  | 0.0186 |
| Norharmane                              | Positive | sIgA  | 0.7212  | 0.0186 |
| 4-Hydroxybutanoic acid lactone          | Positive | sIgA  | 0.7212  | 0.0186 |
| L-Phenylalanine                         | Positive | sIgA  | 0.7212  | 0.0186 |
| Betaine                                 | Positive | sIgA  | 0.7212  | 0.0186 |
| 3-Phospho-D-glycerate                   | Negative | IgG   | -0.7112 | 0.0211 |
| Cyclohexylamine                         | Negative | IL-6  | -0.7091 | 0.0217 |
| Ser-Asp                                 | Negative | IL-6  | -0.7091 | 0.0217 |

|                                           |          |      |         |        |
|-------------------------------------------|----------|------|---------|--------|
| Guanosine 5'-diphosphate (GDP)            | Negative | IL-6 | -0.7091 | 0.0217 |
| Glyceraldehyde 3-phosphate                | Positive | sIgA | 0.7091  | 0.0217 |
| alpha-D-Glucose 1-phosphate               | Negative | IL-6 | -0.7091 | 0.0217 |
| D-Proline                                 | Negative | sIgA | -0.7091 | 0.0217 |
| Ser-Glu                                   | Positive | sIgA | 0.7091  | 0.0217 |
| L-Arginine                                | Negative | IL-6 | -0.7091 | 0.0217 |
| gamma-L-Glutamyl-L-phenylalanine          | Positive | sIgA | 0.6970  | 0.0251 |
| Creatinine                                | Positive | sIgA | 0.6970  | 0.0251 |
| Ala-Glu                                   | Positive | sIgA | 0.6970  | 0.0251 |
| Nicotinamide adenine dinucleotide (NAD)   | Positive | sIgA | 0.6970  | 0.0251 |
| Arg-Glu                                   | Positive | sIgA | 0.6970  | 0.0251 |
| L-Phenylalanine                           | Negative | IL-6 | -0.6970 | 0.0251 |
| N6-Methyl-L-lysine                        | Negative | IL-6 | -0.6970 | 0.0251 |
| Acetylcarnitine                           | Positive | sIgA | 0.6970  | 0.0251 |
| Phosphoenolpyruvate                       | Negative | IgG  | -0.6869 | 0.0282 |
| Glycerol 3-phosphate                      | Positive | sIgA | 0.6848  | 0.0289 |
| Ser-Asp                                   | Positive | sIgA | 0.6848  | 0.0289 |
| Ala-Asp                                   | Positive | sIgA | 0.6848  | 0.0289 |
| Vanillin                                  | Positive | sIgA | 0.6848  | 0.0289 |
| DL-Indole-3-lactic acid                   | Negative | IL-6 | -0.6848 | 0.0289 |
| 2'-O-methylcytidine                       | Positive | sIgA | 0.6848  | 0.0289 |
| Uridine 5'-monophosphate (UMP)            | Positive | sIgA | 0.6848  | 0.0289 |
| Uridine 5'-monophosphate (UMP)            | Negative | IL-6 | -0.6848 | 0.0289 |
| L-Pipecolic acid                          | Positive | sIgA | 0.6848  | 0.0289 |
| (3-Carboxypropyl)trimethylammonium cation | Positive | sIgA | 0.6848  | 0.0289 |
| L-Tyrosine                                | Positive | sIgA | 0.6848  | 0.0289 |
| Cytosine                                  | Negative | IL-6 | -0.6848 | 0.0289 |
| L-.alpha.-Amino-.gamma.-butyrolactone     | Negative | IL-6 | -0.6848 | 0.0289 |
| Cytidine 5'-monophosphate (CMP)           | Negative | IL-6 | -0.6848 | 0.0289 |
| 4-Hydroxybutanoic acid lactone            | Positive | IgG  | 0.6809  | 0.0302 |
| gamma-L-Glutamyl-L-glutamic acid          | Positive | IgG  | 0.6748  | 0.0323 |
| Thr-Glu                                   | Positive | sIgA | 0.6727  | 0.0330 |
| L-Glutamate                               | Negative | IL-6 | -0.6727 | 0.0330 |
| ADP-ribose                                | Positive | sIgA | 0.6727  | 0.0330 |
| N-Acetyl-L-Histidine                      | Negative | IL-6 | -0.6727 | 0.0330 |
| L-Fucose-1-phosphate                      | Negative | IL-6 | -0.6727 | 0.0330 |
| Glycerophosphocholine                     | Negative | IL-6 | -0.6727 | 0.0330 |
| L-Tyrosine                                | Positive | IgG  | 0.6687  | 0.0345 |
| Thr-Glu                                   | Negative | IL-6 | -0.6606 | 0.0376 |
| Vanillin                                  | Negative | IL-6 | -0.6606 | 0.0376 |
| L-Aspartate                               | Negative | IL-6 | -0.6606 | 0.0376 |
| Tyramine                                  | Positive | sIgA | 0.6606  | 0.0376 |
| N6-Methyl-L-lysine                        | Positive | sIgA | 0.6606  | 0.0376 |

|                                              |          |       |         |        |
|----------------------------------------------|----------|-------|---------|--------|
| trans-2-Hydroxycinnamic acid                 | Positive | sIgA  | 0.6606  | 0.0376 |
| L-.alpha.-Amino-.gamma.-butyrolactone        | Positive | sIgA  | 0.6606  | 0.0376 |
| Glycerol 3-phosphate                         | Negative | IL-6  | -0.6485 | 0.0425 |
| Isomaltose                                   | Positive | IL-6  | 0.6485  | 0.0425 |
| Ile-Glu                                      | Negative | IL-6  | -0.6485 | 0.0425 |
| Guanosine 5'-diphosphate (GDP)               | Positive | sIgA  | 0.6485  | 0.0425 |
| gamma-L-Glutamyl-L-valine                    | Negative | IL-6  | -0.6485 | 0.0425 |
| Uridine 5'-diphosphate (UDP)                 | Negative | IL-6  | -0.6485 | 0.0425 |
| N6,N6,N6-Trimethyl-L-lysine                  | Positive | sIgA  | 0.6485  | 0.0425 |
| (3-Carboxypropyl)trimethylammonium<br>cation | Negative | IL-6  | -0.6485 | 0.0425 |
| L-Methionine                                 | Positive | sIgA  | 0.6485  | 0.0425 |
| L-Methionine                                 | Negative | IL-6  | -0.6485 | 0.0425 |
| Acetylcarnitine                              | Positive | IgG   | 0.6444  | 0.0443 |
| Ala-Asp                                      | Negative | IL-6  | -0.6364 | 0.0479 |
| Ile-Asp                                      | Negative | T-SOD | -0.6364 | 0.0479 |
| D-Pipecolic acid                             | Negative | IL-6  | -0.6364 | 0.0479 |
| Dopamine                                     | Positive | sIgA  | 0.6364  | 0.0479 |
| Flavin adenine dinucleotide (FAD)            | Negative | sIgA  | -0.6364 | 0.0479 |
| L-Proline                                    | Positive | sIgA  | 0.6364  | 0.0479 |
